# Supplementary material for: Skin microbiota variation in Indian families
Source: PeerJ journal article supplement (doi:10.7717/peerj.18881), 2025-02-28
Supplement: data.zip [file Supplemental Information2.xlsx]

## Sheet: Sheet1
OTUU	Kingdom	Phylum	Class	Order	Family	Genus
OTU1	Bacteria	Firmicutes	Bacilli	Lactobacillales	Aerococcaceae	Abiotrophia
OTU2	Bacteria	Acidobacteria	Holophagae	Acanthopleuribacterales	Acanthopleuribacteraceae	Acanthopleuribacter
OTU3	Bacteria	Firmicutes	Clostridia	Clostridiales	Lachnospiraceae	Acetitomaculum
OTU4	Bacteria	Firmicutes	Clostridia	Eubacteriales	Oscillospiraceae	Acetivibrio
OTU5	Bacteria	Firmicutes	Clostridia	Clostridiales	Peptostreptococcaceae	Acetoanaerobium
OTU6	Bacteria	Proteobacteria	Alphaproteobacteria	Rhodospirillales	Acetobacteraceae	Acetobacter
OTU7	Bacteria	Firmicutes	Clostridia	Clostridiales	Eubacteriaceae	Acetobacterium
OTU8	Bacteria	Firmicutes	Negativicutes	Selenomonadales	Sporomusaceae	Acetonema
OTU9	Bacteria	Firmicutes	Mollicutes	Acholeplasmatales	Acholeplasmataceae	Acholeplasma
OTU10	Bacteria	Proteobacteria	Betaproteobacteria	Burkholderiales	Alcaligenaceae	Achromobacter
OTU11	Bacteria	Firmicutes	Clostridia	Clostridiales	Incertae Sedis	Acidaminobacter
OTU12	Bacteria	Firmicutes	Negativicutes	Acidaminococcales	Acidaminococcaceae	Acidaminococcus
OTU13	Bacteria	Actinobacteria	Acidimicrobiia	Acidimicrobiales	Acidimicrobiaceae	Aciditerrimonas
OTU14	Bacteria	Proteobacteria	Acidithiobacillia	Acidithiobacillales	Acidithiobacillaceae	Acidithiobacillus
OTU15	Bacteria	Proteobacteria	Alphaproteobacteria	Rhodospirillales	Acetobacteraceae	Acidocella
OTU16	Bacteria	Proteobacteria	Betaproteobacteria	Burkholderiales	Comamonadaceae	Acidovorax
OTU17	Bacteria	Proteobacteria	Gammaproteobacteria	Pseudomonadales	Moraxellaceae	Acinetobacter
OTU18	Bacteria	Actinobacteria	Actinomycetia	Streptosporangiales	Streptosporangiaceae	Acrocarpospora
OTU19	Bacteria	Actinobacteria	Actinobacteria	Streptosporangiales	Thermomonosporaceae	Actinoallomurus
OTU20	Bacteria	Proteobacteria	Gammaproteobacteria	Pasteurellales	Pasteurellaceae	Actinobacillus
OTU21	Bacteria	Actinobacteria	Actinobacteria	Actinomycetales	Actinomycetaceae	Actinobaculum
OTU22	Bacteria	Actinobacteria	Actinobacteria	Micromonosporales	Micromonosporaceae	Actinocatenispora
OTU23	Bacteria	Actinobacteria	Actinobacteria	Streptosporangiales	Thermomonosporaceae	Actinocorallia
OTU24	Bacteria	Actinobacteria	Actinobacteria	Pseudonocardiales	Pseudonocardiaceae	Actinokineospora
OTU25	Bacteria	Actinobacteria	Actinobacteria	Streptosporangiales	Thermomonosporaceae	Actinomadura
OTU26	Bacteria	Actinobacteria	Actinobacteria	Actinomycetales	Actinomycetaceae	Actinomyces
OTU27	Bacteria	Actinobacteria	Actinomycetia	Pseudonocardiales	Pseudonocardiaceae	Actinophytocola
OTU28	Bacteria	Actinobacteria	Actinobacteria	Micromonosporales	Micromonosporaceae	Actinoplanes
OTU29	Bacteria	Actinobacteria	Actinobacteria	Propionibacteriales	Nocardioidaceae	Actinopolymorpha
OTU30	Bacteria	Actinobacteria	Actinomycetia	Actinopolysporales	Actinopolysporaceae	Actinopolyspora
OTU31	Bacteria	Actinobacteria	Actinobacteria	Micrococcales	Cellulomonadaceae	Actinotalea
OTU32	Bacteria	Actinobacteria	Actinobacteria	Actinomycetales	Actinomycetaceae	Actinotignum
OTU33	Bacteria	Proteobacteria	Betaproteobacteria	Burkholderiales	Alcaligenaceae	Advenella
OTU34	Bacteria	Firmicutes	Bacilli	Bacillales	Bacillaceae	Aeribacillus
OTU35	Bacteria	Firmicutes	Bacilli	Lactobacillales	Aerococcaceae	Aerococcus
OTU36	Bacteria	Actinobacteria	Actinobacteria	Propionibacteriales	Nocardioidaceae	Aeromicrobium
OTU37	Bacteria	Proteobacteria	Gammaproteobacteria	Aeromonadales	Aeromonadaceae	Aeromonas
OTU38	Bacteria	Proteobacteria	Alphaproteobacteria	Rhodospirillales	Rhodospirillaceae	Aestuariispira
OTU39	Bacteria	Proteobacteria	Gammaproteobacteria	Alteromonadales	Alteromonadaceae	Agaribacter
OTU40	Bacteria	Proteobacteria	Gammaproteobacteria	Pasteurellales	Pasteurellaceae	Aggregatibacter
OTU41	Bacteria	Actinobacteria	Actinobacteria	Micrococcales	Microbacteriaceae	Agrococcus
OTU42	Bacteria	Actinobacteria	Actinobacteria	Micrococcales	Microbacteriaceae	Agromyces
OTU43	Bacteria	Proteobacteria	Gammaproteobacteria	Oceanospirillales	Halomonadaceae	Aidingimonas
OTU44	Bacteria	Proteobacteria	Alphaproteobacteria	Rhodobacterales	Rhodobacteraceae	Albidovulum
OTU45	Bacteria	Proteobacteria	Gammaproteobacteria	Oceanospirillales	Alcanivoracaceae	Alcanivorax
OTU46	Bacteria	Proteobacteria	Gammaproteobacteria	Alteromonadales	Pseudoalteromonadaceae	Algicola
OTU47	Bacteria	Proteobacteria	Alphaproteobacteria	Rhodobacterales	Hyphomonadaceae	Algimonas
OTU48	Bacteria	Proteobacteria	Gammaproteobacteria	Nevskiales	Algiphilaceae	Algiphilus
OTU49	Bacteria	Bacteroidota	Cytophagia	Cytophagales	Cyclobacteriaceae	Algoriphagus
OTU50	Bacteria	Firmicutes	Bacilli	Bacillales	Alicyclobacillaceae	Alicyclobacillus
OTU51	Bacteria	Proteobacteria	Gammaproteobacteria	Alteromonadales	Idiomarinaceae	Aliidiomarina
OTU52	Bacteria	Proteobacteria	Gammaproteobacteria	Alteromonadales	Alteromonadaceae	Aliiglaciecola
OTU53	Bacteria	Proteobacteria	Gammaproteobacteria	Alteromonadales	Alteromonadaceae	Alishewanella
OTU54	Bacteria	Firmicutes	Bacilli	Bacillales	Bacillaceae	Alkalibacillus
OTU55	Bacteria	Firmicutes	Clostridia	Clostridiales	Eubacteriaceae	Alkalibacter
OTU56	Bacteria	Firmicutes	Bacilli	Lactobacillales	Carnobacteriaceae	Alkalibacterium
OTU57	Bacteria	Proteobacteria	Gammaproteobacteria	NA	NA	Alkalimonas
OTU58	Bacteria	Firmicutes	Clostridia	Clostridiales	Clostridiaceae	Alkaliphilus
OTU59	Bacteria	Proteobacteria	Gammaproteobacteria	Pseudomonadales	Moraxellaceae	Alkanindiges
OTU60	Bacteria	Actinobacteria	Actinomycetia	Pseudonocardiales	Pseudonocardiaceae	Alloactinosynnema
OTU61	Bacteria	Firmicutes	Bacilli	Bacillales	Bacillaceae	Allobacillus
OTU62	Bacteria	Firmicutes	Erysipelotrichia	Erysipelotrichales	Erysipelotrichaceae	Allobaculum
OTU63	Bacteria	Actinobacteria	Actinobacteria	Micromonosporales	Micromonosporaceae	Allocatelliglobosispora
OTU64	Bacteria	Proteobacteria	Gammaproteobacteria	Chromatiales	Chromatiaceae	Allochromatium
OTU65	Bacteria	Firmicutes	Bacilli	Lactobacillales	Carnobacteriaceae	Allofustis
OTU66	Bacteria	Firmicutes	Bacilli	Lactobacillales	Carnobacteriaceae	Alloiococcus
OTU67	Bacteria	Actinobacteria	Actinomycetia	Streptosporangiales	NA	Allonocardiopsis
OTU68	Bacteria	Actinobacteria	Actinobacteria	Bifidobacteriales	Bifidobacteriaceae	Alloscardovia
OTU69	Bacteria	Actinobacteria	Actinobacteria	Micrococcales	Microbacteriaceae	Alpinimonas
OTU70	Bacteria	Proteobacteria	Alphaproteobacteria	Sphingomonadales	Erythrobacteraceae	Altererythrobacter
OTU71	Bacteria	Firmicutes	Bacilli	Bacillales	Bacillaceae	Alteribacillus
OTU72	Bacteria	Proteobacteria	Gammaproteobacteria	Alteromonadales	Alteromonadaceae	Alteromonas
OTU73	Bacteria	Proteobacteria	Alphaproteobacteria	Rhodobacterales	Rhodobacteraceae	Amaricoccus
OTU74	Bacteria	NA	NA	NA	NA	Aminicenantes_genera_incertae_sedis
OTU75	Bacteria	Proteobacteria	Alphaproteobacteria	Hyphomicrobiales	Phyllobacteriaceae	Aminobacter
OTU76	Bacteria	Firmicutes	Clostridia	Thermoanaerobacterales	Thermoanaerobacteraceae	Ammonifex
OTU77	Bacteria	Firmicutes	Bacilli	Bacillales	Paenibacillaceae	Ammoniibacillus
OTU78	Bacteria	Firmicutes	Bacilli	Bacillales	Paenibacillaceae	Ammoniphilus
OTU79	Bacteria	Actinobacteria	Actinomycetia	Micrococcales	Microbacteriaceae	Amnibacterium
OTU80	Bacteria	Proteobacteria	Alphaproteobacteria	Hyphomicrobiales	Amorphaceae	Amorphus
OTU81	Bacteria	Firmicutes	Bacilli	Bacillales	Bacillaceae	Amphibacillus
OTU82	Bacteria	Proteobacteria	Gammaproteobacteria	Oceanospirillales	Oceanospirillaceae	Amphritea
OTU83	Bacteria	Actinobacteria	Actinobacteria	Pseudonocardiales	Pseudonocardiaceae	Amycolatopsis
OTU84	Bacteria	Actinobacteria	Actinobacteria	Corynebacteriales	Mycobacteriaceae	Amycolicicoccus
OTU85	Bacteria	Firmicutes	Negativicutes	Selenomonadales	Sporomusaceae	Anaeroarcus
OTU86	Bacteria	Firmicutes	Bacilli	Bacillales	Bacillaceae	Anaerobacillus
OTU87	Bacteria	Firmicutes	Clostridia	Eubacteriales	Clostridiaceae	Anaerobacter
OTU88	Bacteria	Synergistetes	Synergistia	Synergistales	Synergistaceae	Anaerobaculum
OTU89	Bacteria	Proteobacteria	Gammaproteobacteria	Aeromonadales	Succinivibrionaceae	Anaerobiospirillum
OTU90	Bacteria	Firmicutes	Clostridia	Clostridiales	Proteinivoraceae	Anaerobranca
OTU91	Bacteria	Firmicutes	Tissierellia	Tissierellales	Peptoniphilaceae	Anaerococcus
OTU92	Bacteria	Firmicutes	Clostridia	Clostridiales	Eubacteriaceae	Anaerofustis
OTU93	Bacteria	Firmicutes	Negativicutes	Veillonellales	Veillonellaceae	Anaeroglobus
OTU94	Bacteria	Chloroflexi	Anaerolineae	Anaerolineales	Anaerolineaceae	Anaerolinea
OTU95	Bacteria	Firmicutes	Negativicutes	Selenomonadales	Sporomusaceae	Anaeromusa
OTU96	Bacteria	Proteobacteria	Deltaproteobacteria	Myxococcales	Anaeromyxobacteraceae	Anaeromyxobacter
OTU97	Bacteria	Tenericutes	Mollicutes	Anaeroplasmatales	Anaeroplasmataceae	Anaeroplasma
OTU98	Bacteria	Firmicutes	Tissierellia	Tissierellales	Peptoniphilaceae	Anaerosphaera
OTU99	Bacteria	Firmicutes	Clostridia	Clostridiales	Ruminococcaceae	Anaerotruncus
OTU100	Bacteria	Firmicutes	Clostridia	Clostridiales	Clostridiales Family XIII. Incertae Sedis	Anaerovorax
OTU101	Bacteria	Proteobacteria	Alphaproteobacteria	Rickettsiales	Anaplasmataceae	Anaplasma
OTU102	Bacteria	Proteobacteria	Betaproteobacteria	Neisseriales	Chromobacteriaceae	Andreprevotia
OTU103	Bacteria	Firmicutes	Bacilli	Bacillales	Paenibacillaceae	Aneurinibacillus
OTU104	Bacteria	Proteobacteria	Deltaproteobacteria	Myxococcales	Archangiaceae	Angiococcus
OTU105	Bacteria	Actinobacteria	Actinobacteria	Kineosporiales	Kineosporiaceae	Angustibacter
OTU106	Bacteria	Firmicutes	Bacilli	Bacillales	Bacillaceae	Anoxybacillus
OTU107	Bacteria	Proteobacteria	Betaproteobacteria	Burkholderiales	NA	Aquabacterium
OTU108	Bacteria	Proteobacteria	Betaproteobacteria	Neisseriales	Chromobacteriaceae	Aquaspirillum
OTU109	Bacteria	Firmicutes	Bacilli	Bacillales	Bacillaceae	Aquibacillus
OTU110	Bacteria	Proteobacteria	Gammaproteobacteria	Legionellales	Coxiellaceae	Aquicella
OTU111	Bacteria	Proteobacteria	Gammaproteobacteria	Xanthomonadales	Rhodanobacteraceae	Aquimonas
OTU112	Bacteria	Proteobacteria	Gammaproteobacteria	Chromatiales	Ectothiorhodospiraceae	Aquisalimonas
OTU113	Bacteria	Bacteroidetes	Chitinophagia	Chitinophagales	Chitinophagaceae	Arachidicoccus
OTU114	Bacteria	Actinobacteria	Actinobacteria	Actinomycetales	Actinomycetaceae	Arcanobacterium
OTU115	Bacteria	Proteobacteria	Epsilonproteobacteria	Campylobacterales	Campylobacteraceae	Arcobacter
OTU116	Bacteria	Proteobacteria	Gammaproteobacteria	Arenicellales	Arenicellaceae	Arenicella
OTU117	Bacteria	Proteobacteria	Gammaproteobacteria	Xanthomonadales	Xanthomonadaceae	Arenimonas
OTU118	Bacteria	Proteobacteria	Gammaproteobacteria	Chromatiales	Ectothiorhodospiraceae	Arhodomonas
OTU119	Bacteria	NA	NA	NA	NA	Armatimonadetes_gp2
OTU120	Bacteria	NA	NA	NA	NA	Armatimonadetes_gp4
OTU121	Bacteria	NA	NA	NA	NA	Armatimonadetes_gp5
OTU122	Bacteria	NA	NA	NA	NA	Armatimonadetes_gp7
OTU123	Bacteria	NA	NA	NA	NA	Armatimonas/Armatimonadetes_gp1
OTU124	Bacteria	Actinobacteria	Actinobacteria	Micrococcales	Intrasporangiaceae	Arsenicicoccus
OTU125	Bacteria	Proteobacteria	Gammaproteobacteria	Enterobacterales	Morganellaceae	Arsenophonus
OTU126	Bacteria	Actinobacteria	Actinobacteria	Micrococcales	Micrococcaceae	Arthrobacter
OTU127	Bacteria	Firmicutes	Clostridia	Eubacteriales	Peptostreptococcaceae	Asaccharospora
OTU128	Bacteria	Tenericutes	Mollicutes	Anaeroplasmatales	Anaeroplasmataceae	Asteroleplasma
OTU129	Bacteria	Proteobacteria	Alphaproteobacteria	Caulobacterales	Caulobacteraceae	Asticcacaulis
OTU130	Bacteria	Firmicutes	Bacilli	Lactobacillales	Carnobacteriaceae	Atopobacter
OTU131	Bacteria	Actinobacteria	Coriobacteriia	Coriobacteriales	Atopobiaceae	Atopobium
OTU132	Bacteria	Firmicutes	Bacilli	lactobacillales	Carnobacteriaceae	Atopococcus
OTU133	Bacteria	Firmicutes	Bacilli	lactobacillales	Carnobacteriaceae	Atopostipes
OTU134	Bacteria	Atribacterota	NA	NA	NA	Atribacteria_genera_incertae_sedis
OTU135	Bacteria	Proteobacteria	Alphaproteobacteria	Rhizobiales	Aurantimonadaceae	Aureimonas
OTU136	Bacteria	Bacteroidetes	Saprospiria	Saprospirales	Saprospiraceae	Aureispira
OTU137	Bacteria	Actinobacteria	Actinobacteria	Micrococcales	Micrococcaceae	Auritidibacter
OTU138	Bacteria	Actinobacteria	Actinobacteria	Micrococcales	Dermatophilaceae	Austwickia
OTU139	Bacteria	Proteobacteria	Betaproteobacteria	Rhodocyclales	Zoogloeaceae	Azoarcus
OTU140	Bacteria	Proteobacteria	Betaproteobacteria	Burkholderiales	Alcaligenaceae	Azohydromonas
OTU141	Bacteria	Proteobacteria	Proteobacteria	Pseudomonadales	Pseudomonadaceae	Azomonas
OTU142	Bacteria	Proteobacteria	Alphaproteobacteria	Rhizobiales	Xanthobacteraceae	Azorhizobium
OTU143	Bacteria	Proteobacteria	Alphaproteobacteria	Rhodospirillales	Rhodospirillaceae	Azospirillum
OTU144	Bacteria	Proteobacteria	Gammaproteobacteria	Pseudomonadales	Pseudomonadaceae	Azotobacter
OTU145	Bacteria	Firmicutes	Bacilli	Bacillales	Bacillaceae	Bacillus
OTU146	Bacteria	Bacteroidetes	Bacteroidia	Bacteroidales	Bacteroidaceae	Bacteroides
OTU147	Bacteria	Proteobacteria	Gammaproteobacteria	Oceanospirillales	Balneatrichaceae	Balneatrix
OTU148	Bacteria	Balneolaeota	Balneolia	Balneolales	Balneolaceae	Balneola
OTU149	Bacteria	Bacteroidetes	Bacteroidia	Bacteroidales	Barnesiellaceae	Barnesiella
OTU150	Bacteria	Actinobacteria	Actinobacteria	Micrococcales	Dermacoccaceae	Barrientosiimonas
OTU151	Bacteria	Firmicutes	Bacilli	lactobacillales	Enterococcaceae	Bavariicoccus
OTU152	Bacteria	Proteobacteria	Oligoflexia	Bdellovibrionales	Bdellovibrionaceae	Bdellovibrio
OTU153	Bacteria	Proteobacteria	Alphaproteobacteria	Rhizobiales	Beijerinckiaceae	Beijerinckia
OTU154	Bacteria	Chloroflexi	Anaerolineae	Anaerolineales	Anaerolineaceae	Bellilinea
OTU155	Bacteria	Firmicutes	Bacilli	Bacillales	Planococcaceae	Bhargavaea
OTU156	Bacteria	Actinobacteria	Actinobacteria	Bifidobacteriales	Bifidobacteriaceae	Bifidobacterium
OTU157	Bacteria	Proteobacteria	Deltaproteobacteria	Desulfovibrionales	Desulfovibrionaceae	Bilophila
OTU158	Bacteria	Proteobacteria	Gammaproteobacteria	Enterobacterales	Enterobacteriaceae	Biostraticola
OTU159	Bacteria	Proteobacteria	Gammaproteobacteria	Pasteurellales	Pasteurellaceae	Bisgaardia
OTU160	Bacteria	Proteobacteria	Gammaproteobacteria	Enterobacterales	Enterobacteriaceae	Blastococcus
OTU161	Bacteria	Firmicutes	Clostridia	Clostridiales	Lachnospiraceae	Blautia
OTU162	Bacteria	Actinobacteria	Actinobacteria	Micrococcales	Bogoriellaceae	Bogoriella
OTU163	Bacteria	Proteobacteria	Betaproteobacteria	Burkholderiales	Alcaligenaceae	Bordetella
OTU164	Bacteria	Proteobacteria	Alphaproteobacteria	Rhizobiales	Bradyrhizobiaceae	Bosea
OTU165	Bacteria	Proteobacteria	Gammaproteobacteria	Alteromonadales	Alteromonadaceae	Bowmanella
OTU166	Bacteria	Actinobacteria	Actinobacteria	Micrococcales	Dermabacteraceae	Brachybacterium
OTU167	Bacteria	Spirochaetes	Spirochaetia	Brachyspirales	Brachyspiraceae	Brachyspira
OTU168	Bacteria	Proteobacteria	Betaproteobacteria	Burkholderiales	Alcaligenaceae	Brackiella
OTU169	Bacteria	Proteobacteria	Deltaproteobacteria	Bradymonadales	Bradymonadaceae	Bradymonas
OTU170	Bacteria	Proteobacteria	Alphaproteobacteria	Rhizobiales	Bradyrhizobiaceae	Bradyrhizobium
OTU171	Bacteria	Actinobacteria	Actinobacteria	Micrococcales	Dermabacteraceae	Branchiibius
OTU172	Bacteria	Firmicutes	Tissierellia	Tissierellales	Thermohalobacteraceae	Brassicibacter
OTU173	Bacteria	NA	NA	NA	NA	BRC1_genera_incertae_sedis
OTU174	Bacteria	Proteobacteria	Gammaproteobacteria	Enterobacterales	Pectobacteriaceae	Brenneria
OTU175	Bacteria	Firmicutes	Bacilli	Bacillales	Paenibacillaceae	Brevibacillus
OTU176	Bacteria	Actinobacteria	Actinobacteria	Micrococcales	Brevibacteriaceae	Brevibacterium
OTU177	Bacteria	Proteobacteria	Alphaproteobacteria	Caulobacterales	Caulobacteraceae	Brevundimonas
OTU178	Bacteria	Firmicutes	Bacilli	Bacillales	Listeriaceae	Brochothrix
OTU179	Bacteria	Firmicutes	Limnochordia	Limnochordales	Limnochordaceae	Brockia
OTU180	Bacteria	Actinobacteria	Actinobacteria	Propionibacteriales	Propionibacteriaceae	Brooklawnia
OTU181	Bacteria	Proteobacteria	Gammaproteobacteria	Enterobacterales	Erwiniaceae	Buchnera
OTU182	Bacteria	Proteobacteria	Gammaproteobacteria	Enterobacterales	Budviciaceae	Budvicia
OTU183	Bacteria	Firmicutes	Erysipelotrichia	Erysipelotrichales	Erysipelotrichaceae	Bulleidia
OTU184	Bacteria	Proteobacteria	Betaproteobacteria	Burkholderiales	Burkholderiaceae	Burkholderia
OTU185	Bacteria	Proteobacteria	Gammaproteobacteria	Enterobacterales	Enterobacteriaceae	Buttiauxella
OTU186	Bacteria	Firmicutes	Clostridia	Clostridiales	Clostridiaceae	Butyricicoccus
OTU187	Bacteria	Firmicutes	Clostridia	Eubacteriales	Lachnospiraceae	Butyrivibrio
OTU188	Bacteria	Firmicutes	Bacilli	Bacillales	Bacillaceae	Caldalkalibacillus
OTU189	Bacteria	Firmicutes	Clostridia	Thermoanaerobacterales	Thermoanaerobacteraceae	Caldanaerobacter
OTU190	Bacteria	Firmicutes	Clostridia	Thermoanaerobacterales	Thermoanaerobacteraceae	Caldanaerobius
OTU191	Bacteria	Firmicutes	Bacilli	Bacillales	Bacillaceae	Caldicellulosiruptor
OTU192	Bacteria	Firmicutes	Clostridia	Thermoanaerobacterales	Thermoanaerobacterales Family III. Incertae Sedis	Caldilinea
OTU193	Bacteria	Chloroflexi	Caldilineae	Caldilineales	Caldilineaceae	Caldisericum
OTU194	Bacteria	Caldiserica	Caldisericia	Caldisericales	Caldisericaceae	Calditerricola
OTU195	Bacteria	Firmicutes	Bacilli	Bacillales	Bacillaceae	Calidifontibacter
OTU196	Bacteria	Firmicutes	Clostridia	Eubacteriales	Clostridiaceae	Caloramator
OTU197	Bacteria	Actinobacteria	Actinobacteria	Micrococcales	Dermacoccaceae	Caloranaerobacter
OTU198	Bacteria	Firmicutes	Clostridia	Clostridiales	Clostridiaceae	Campylobacter
OTU199	Bacteria	Candidatus Calescamantes	NA	NA	NA	Candidatus_Calescibacterium
OTU200	Bacteria	Bacteroidetes	Cytophagia	Cytophagales	Amoebophilaceae	Candidatus_Cloacamonas
OTU201	Bacteria	Bacteroidetes	Cytophagia	Cytophagales	Amoebophilaceae	Candidatus_Hydrogenedens
OTU202	Bacteria	Proteobacteria	Betaproteobacteria	Burkholderiales	Alcaligenaceae	Candidimonas
OTU203	Bacteria	Actinobacteria	Actinobacteria	Micrococcales	Microbacteriaceae	Canibacter
OTU204	Bacteria	Firmicutes	Clostridia	Clostridiales	Clostridiales Family XVI. Incertae Sedis	Carboxydocella
OTU205	Bacteria	Firmicutes	Clostridia	Thermoanaerobacterales	Thermoanaerobacteraceae	Carboxydothermus
OTU206	Bacteria	Proteobacteria	Gammaproteobacteria	Cardiobacteriales	Cardiobacteriaceae	Cardiobacterium
OTU207	Bacteria	Firmicutes	Bacilli	Lactobacillales	Carnobacteriaceae	Carnobacterium
OTU208	Bacteria	Firmicutes	Bacilli	Lactobacillales	Enterococcaceae	Catellicoccus
OTU209	Bacteria	Firmicutes	Erysipelotrichia	Erysipelotrichales	Erysipelotrichaceae	Catenibacterium
OTU210	Bacteria	Proteobacteria	Gammaproteobacteria	Alteromonadales	Alteromonadaceae	Catenovulum
OTU211	Bacteria	Actinobacteria	Actinobacteria	Catenulisporales	Catenulisporaceae	Catenulispora
OTU212	Bacteria	Actinobacteria	Actinomycetia	Micromonosporales	Micromonosporaceae	Catenuloplanes
OTU213	Bacteria	Proteobacteria	Alphaproteobacteria	Caulobacterales	Caulobacteraceae	Caulobacter
OTU214	Bacteria	Proteobacteria	Gammaproteobacteria	Enterobacterales	Enterobacteriaceae	Cedecea
OTU215	Bacteria	Proteobacteria	Gammaproteobacteria	NA	Celerinatantimonadaceae	Celerinatantimonas
OTU216	Bacteria	Actinobacteria	Actinobacteria	Micrococcales	Cellulomonadaceae	Cellulomonas
OTU217	Bacteria	Firmicutes	Clostridia	Eubacteriales	Lachnospiraceae	Cellulosilyticum
OTU218	Bacteria	Actinobacteria	Actinobacteria	Micrococcales	Promicromonosporaceae	Cellulosimicrobium
OTU219	Bacteria	Proteobacteria	Gammaproteobacteria	Cellvibrionales	Cellvibrionaceae	Cellvibrio
OTU220	Bacteria	Firmicutes	Bacilli	Bacillales	Bacillaceae	Cerasibacillus
OTU221	Bacteria	Proteobacteria	Alphaproteobacteria	Hyphomicrobiales	Phyllobacteriaceae	Chelativorans
OTU222	Bacteria	Proteobacteria	Gammaproteobacteria	Pasteurellales	Pasteurellaceae	Chelonobacter
OTU223	Bacteria	Proteobacteria	Betaproteobacteria	Burkholderiales	Burkholderiaceae	Chitinimonas
OTU224	Bacteria	Fibrobacteres	Chitinispirillia	Chitinispirillales	Chitinispirillaceae	Chitinivibrio
OTU225	Bacteria	Chlamydiae	Chlamydiia	Chlamydiales	Chlamydiaceae	Chlamydia
OTU226	Bacteria	Chlorobi	Chlorobia	Chlorobiales	Chlorobiaceae	Chlorobaculum
OTU227	Bacteria	Bacteroidetes	Chlorobia	Chlorobiales	Chlorobiaceae	Chloroherpeton
OTU228	Bacteria	Chlorophyta	Chlorophyceae	Chlamydomonadales	Chlamydomonadaceae	Chlorophyta
OTU229	Bacteria	Proteobacteria	Gammaproteobacteria	Chromatiales	Chromatiaceae	Chromatium
OTU230	Bacteria	Proteobacteria	Betaproteobacteria	Neisseriales	Chromobacteriaceae	Chromohalobacter
OTU231	Bacteria	Bacteroidetes	Flavobacteriia	Flavobacteriales	Flavobacteriaceae	Chryseobacterium
OTU232	Bacteria	Firmicutes	Bacilli	Bacillales	Planococcaceae	Chryseomicrobium
OTU233	Bacteria	Armatimonadetes	NA	NA	NA	Chthonomonas/Armatimonadetes_gp3
OTU234	Bacteria	Firmicutes	Bacilli	lactobacillales	NA	Chungangia
OTU235	Bacteria	Actinobacteria	Actinobacteria	Micrococcales	Micrococcaceae	Citricoccus
OTU236	Bacteria	Proteobacteria	Gammaproteobacteria	Enterobacterales	Enterobacteriaceae	Citrobacter
OTU237	Bacteria	Bacteroidota	Flavobacteriia	Flavobacteriales	Weeksellaceae	Cloacibacterium
OTU238	Bacteria	Firmicutes	Clostridia	Clostridiales	Clostridiaceae	Clostridium_III
OTU239	Bacteria	Firmicutes	Clostridia	Clostridiales	Clostridiaceae	Clostridium_IV
OTU240	Bacteria	Firmicutes	Clostridia	Clostridiales	Clostridiaceae	Clostridium_sensu_stricto
OTU241	Bacteria	Firmicutes	Clostridia	Clostridiales	Clostridiaceae	Clostridium_XI
OTU242	Bacteria	Firmicutes	Clostridia	Clostridiales	Clostridiaceae	Clostridium_XII
OTU243	Bacteria	Firmicutes	Clostridia	Clostridiales	Clostridiaceae	Clostridium_XlVa
OTU244	Bacteria	Firmicutes	Clostridia	Clostridiales	Clostridiaceae	Clostridium_XlVb
OTU245	Bacteria	Firmicutes	Clostridia	Clostridiales	Clostridiaceae	Clostridium_XVIII
OTU246	Bacteria	Firmicutes	Bacilli	Bacillales	Paenibacillaceae	Cohnella
OTU247	Bacteria	Actinobacteria	Coriobacteriia	Coriobacteriales	Coriobacteriaceae	Collinsella
OTU248	Bacteria	Proteobacteria	Gammaproteobacteria	Alteromonadales	Colwelliaceae	Colwellia
OTU249	Bacteria	Proteobacteria	Betaproteobacteria	Burkholderiales	Comamonadaceae	Comamonas
OTU250	Bacteria	Firmicutes	Bacilli	Bacillales	Bacillaceae	Compostibacillus
OTU251	Bacteria	Proteobacteria	Betaproteobacteria	Neisseriales	Neisseriaceae	Conchiformibius
OTU252	Bacteria	Actinobacteria	Thermoleophilia	Solirubrobacterales	Conexibacteraceae	Conexibacter
OTU253	Bacteria	Proteobacteria	Gammaproteobacteria	Cellvibrionales	Halieaceae	Congregibacter
OTU254	Bacteria	Proteobacteria	Alphaproteobacteria	Rhodospirillales	Stellaceae	Constrictibacter
OTU255	Bacteria	Firmicutes	Erysipelotrichia	Erysipelotrichales	Erysipelotrichaceae	Coprobacillus
OTU256	Bacteria	Firmicutes	Clostridia	Clostridiales	Lachnospiraceae	Coprococcus
OTU257	Bacteria	Proteobacteria	Gammaproteobacteria	Alteromonadales	Alteromonadaceae	Corallomonas
OTU258	Bacteria	Actinobacteria	Actinobacteria	Corynebacteriales	Corynebacteriaceae	Corynebacterium
OTU259	Bacteria	Proteobacteria	Gammaproteobacteria	Enterobacterales	Morganellaceae	Cosenzaea
OTU260	Bacteria	Proteobacteria	Gammaproteobacteria	Legionellales	Coxiellaceae	Coxiella
OTU261	Bacteria	Proteobacteria	Gammaproteobacteria	Enterobacterales	Enterobacteriaceae	Cronobacter
OTU262	Bacteria	Proteobacteria	Gammaproteobacteria	Enterobacterales	Enterobacteriaceae	Cruoricaptor
OTU263	Bacteria	Actinobacteria	Actinobacteria	Micrococcales	Microbacteriaceae	Cryobacterium
OTU264	Bacteria	Bacteroidota	Flavobacteriia	Flavobacteriales	Cryomorphaceae	Cryomorpha
OTU265	Bacteria	Firmicutes	Clostridia	Clostridiales	Peptococcaceae	Cryptanaerobacter
OTU266	Bacteria	Actinobacteria	Actinobacteria	Cryptosporangiales	Cryptosporangiaceae	Cryptosporangium
OTU267	Bacteria	Actinobacteria	Actinobacteria	Micrococcales	Microbacteriaceae	Curtobacterium
OTU268	Bacteria	Proteobacteria	Gammaproteobacteria	Thiotrichales	Piscirickettsiaceae	Cycloclasticus
OTU269	Bacteria	Bacteroidota	Cytophagia	Cytophagales	Cytophagaceae	Cytophaga
OTU270	Bacteria	Actinobacteria	Actinomycetia	Micromonosporales	Micromonosporaceae	Dactylosporangium
OTU271	Bacteria	Deferribacteres	Deferribacteres	Deferribacterales	Deferribacteraceae	Deferribacter
OTU272	Bacteria	Proteobacteria	Deltaproteobacteria	NA	NA	Deferrisoma
OTU273	Bacteria	Proteobacteria	Alphaproteobacteria	Rhodospirillales	Rhodospirillaceae	Defluviicoccus
OTU274	Bacteria	Proteobacteria	Alphaproteobacteria	Rhodobacterales	Rhodobacteraceae	Defluviimonas
OTU275	Bacteria	Firmicutes	Clostridia	Clostridiales	Peptococcaceae	Dehalobacter
OTU276	Bacteria	Chloroflexi	Dehalococcoidia	Dehalococcoidales	Dehalococcoidaceae	Dehalococcoides
OTU277	Bacteria	Deinococcus-Thermus	Deinococci	Deinococcales	Deinococcaceae	Dehalogenimonas
OTU278	Bacteria	Deinococcus-Thermus	Deinococci	Deinococcales	Deinococcaceae	Deinococcus
OTU279	Bacteria	Proteobacteria	Gammaproteobacteria	Burkholderiales	Comamonadaceae	Delftia
OTU280	Bacteria	Actinobacteria	Actinobacteria	Micrococcales	Demequinaceae	Demequina
OTU281	Bacteria	Actinobacteria	Actinobacteria	Micrococcales	Dermacoccaceae	Demetria
OTU282	Bacteria	Proteobacteria	Betaproteobacteria	Nitrosomonadales	Sterolibacteriaceae	Denitratisoma
OTU283	Bacteria	Actinobacteria	Actinobacteria	Micrococcales	Dermabacteraceae	Dermabacter
OTU284	Bacteria	Actinobacteria	Actinobacteria	Micrococcales	Dermabacteraceae	Dermacoccus
OTU285	Bacteria	Actinobacteria	Actinomycetia	Micrococcales	Dermabacteraceae	Dermatophilus
OTU286	Bacteria	Proteobacteria	Betaproteobacteria	Burkholderiales	Alcaligenaceae	Derxia
OTU287	Bacteria	Firmicutes	Bacilli	Lactobacillales	Carnobacteriaceae	Desemzia
OTU288	Bacteria	Proteobacteria	Alphaproteobacteria	Rhodospirillales	Rhodospirillaceae	Desertibacter
OTU289	Bacteria	Proteobacteria	Deltaproteobacteria	Syntrophobacterales	Syntrophobacteraceae	Desulfacinum
OTU290	Bacteria	Proteobacteria	Deltaproteobacteria	Desulfarculales	Desulfarculaceae	Desulfarculus
OTU291	Bacteria	Proteobacteria	Deltaproteobacteria	Desulfobacterales	Desulfobacteraceae	Desulfatibacillum
OTU292	Bacteria	Firmicutes	Clostridia	Clostridiales	Peptococcaceae	Desulfitobacterium
OTU293	Bacteria	Proteobacteria	Deltaproteobacteria	Syntrophales	Syntrophaceae	Desulfobacca
OTU294	Bacteria	Proteobacteria	Deltaproteobacteria	Desulfobacterales	Desulfobacteraceae	Desulfobacterium
OTU295	Bacteria	Proteobacteria	Deltaproteobacteria	Desulfobacterales	Desulfobacteraceae	Desulfobotulus
OTU296	Bacteria	Proteobacteria	Deltaproteobacteria	Desulfobacterales	Desulfobacteraceae	Desulfobulbus
OTU297	Bacteria	Proteobacteria	Deltaproteobacteria	Desulfobacterales	Desulfocapsaceae	Desulfocapsa
OTU298	Bacteria	Proteobacteria	Deltaproteobacteria	Desulfobacterales	Desulfobacteraceae	Desulfocella
OTU299	Bacteria	Proteobacteria	Deltaproteobacteria	Desulfobacterales	Desulfobacteraceae	Desulfococcus
OTU300	Bacteria	Proteobacteria	Deltaproteobacteria	Desulfovibrionales	Desulfovibrionaceae	Desulfocurvus
OTU301	Bacteria	Proteobacteria	Deltaproteobacteria	Desulfobacterales	Desulfobacteraceae	Desulfofaba
OTU302	Bacteria	Proteobacteria	Deltaproteobacteria	Syntrophobacterales	Syntrophobacteraceae	Desulfoglaeba
OTU303	Bacteria	Proteobacteria	Deltaproteobacteria	Desulfovibrionales	Desulfohalobiaceae	Desulfohalobium
OTU304	Bacteria	Proteobacteria	Deltaproteobacteria	Desulfovibrionales	Desulfohalobiaceae	Desulfomicrobium
OTU305	Bacteria	Proteobacteria	Deltaproteobacteria	Syntrophales	Syntrophaceae	Desulfomonile
OTU306	Bacteria	Proteobacteria	Deltaproteobacteria	Desulfobacterales	Desulfosalsimonadaceae	Desulfonatronobacter
OTU307	Bacteria	Proteobacteria	Deltaproteobacteria	Desulfovibrionales	Desulfohalobiaceae	Desulfonatronospira
OTU308	Bacteria	Proteobacteria	Deltaproteobacteria	Desulfovibrionales	Desulfohalobiaceae	Desulfonatronovibrio
OTU309	Bacteria	Proteobacteria	Deltaproteobacteria	Desulfovibrionales	Desulfonatronaceae	Desulfonatronum
OTU310	Bacteria	Proteobacteria	Deltaproteobacteria	Desulfobacterales	Desulfobacteraceae	Desulfonema
OTU311	Bacteria	Firmicutes	Clostridia	Clostridiales	Peptococcaceae	Desulfonispora
OTU312	Bacteria	Proteobacteria	Deltaproteobacteria	Desulfobacterales	Desulfobulbaceae	Desulfopila
OTU313	Bacteria	Proteobacteria	Deltaproteobacteria	Desulfobacterales	Desulfobulbaceae	Desulforhopalus
OTU314	Bacteria	Proteobacteria	Deltaproteobacteria	Desulfobacterales	Desulfobacteraceae	Desulfosarcina
OTU315	Bacteria	Firmicutes	Negativicutes	Selenomonadales	Sporomusaceae	Desulfosporomusa
OTU316	Bacteria	Firmicutes	Negativicutes	Selenomonadales	Sporomusaceae	Desulfosporosinus
OTU317	Bacteria	Firmicutes	Clostridia	Clostridiales	Peptococcaceae	Desulfotomaculum
OTU318	Bacteria	Proteobacteria	Deltaproteobacteria	Desulfovibrionales	Desulfovibrionaceae	Desulfovibrio
OTU319	Bacteria	Proteobacteria	Deltaproteobacteria	Syntrophobacterales	Syntrophobacteraceae	Desulfovirga
OTU320	Bacteria	Proteobacteria	Deltaproteobacteria	Desulfurellales	Desulfurellaceae	Desulfurella
OTU321	Bacteria	Firmicutes	Bacilli	Bacillales	NA	Desulfuribacillus
OTU322	Bacteria	Proteobacteria	Deltaproteobacteria	Desulfuromonadales	Desulfuromonadaceae	Desulfuromonas
OTU323	Bacteria	Chrysiogenetes	Chrysiogenetes	Chrysiogenales	Chrysiogenaceae	Desulfurispira
OTU324	Bacteria	Aquificae	Aquificae	Desulfurobacteriales	Desulfurobacteriaceae	Desulfurobacterium
OTU325	Bacteria	Actinobacteria	Actinobacteria	Micrococcales	Dermabacteraceae	Devriesea
OTU326	Bacteria	Firmicutes	Negativicutes	Veillonellales	Veillonellaceae	Dialister
OTU327	Bacteria	Proteobacteria	Gammaproteobacteria	Enterobacterales	Erwiniaceae	Dickeya
OTU328	Bacteria	Actinobacteria	Actinobacteria	Corynebacteriales	Dietziaceae	Dietzia
OTU329	Bacteria	Proteobacteria	Gammaproteobacteria	Legionellales	Coxiellaceae	Diplorickettsia
OTU330	Bacteria	Proteobacteria	Gammaproteobacteria	Xanthomonadales	Rhodanobacteraceae	Dokdonella
OTU331	Bacteria	Bacteroidetes	Flavobacteriia	Flavobacteriales	Flavobacteriaceae	Dokdonia
OTU332	Bacteria	Firmicutes	Bacilli	Lactobacillales	Aerococcaceae	Dolosicoccus
OTU333	Bacteria	Firmicutes	Bacilli	Lactobacillales	Carnobacteriaceae	Dolosigranulum
OTU334	Bacteria	Firmicutes	Bacilli	Bacillales	Bacillaceae	Domibacillus
OTU335	Bacteria	Firmicutes	Clostridia	Clostridiales	Lachnospiraceae	Dorea
OTU336	Bacteria	Bacteroidota	Cytophagia	Cytophagales	Spirosomaceae	Dyadobacter
OTU337	Bacteria	Proteobacteria	Gammaproteobacteria	Xanthomonadales	Rhodanobacteraceae	Dyella
OTU338	Bacteria	Bacteroidetes	Bacteroidia	Bacteroidales	Dysgonamonadaceae	Dysgonomonas
OTU339	Bacteria	Proteobacteria	Gammaproteobacteria	Chromatiales	Ectothiorhodospiraceae	Ectothiorhodospira
OTU340	Bacteria	Proteobacteria	Gammaproteobacteria	Enterobacterales	Hafniaceae	Edwardsiella
OTU341	Bacteria	Firmicutes	Bacilli	Bacillales	Alicyclobacillaceae	Effusibacillus
OTU342	Bacteria	Actinobacteria	Coriobacteriia	Eggerthellales	Eggerthellaceae	Eggerthella
OTU343	Bacteria	Firmicutes	Erysipelotrichia	Erysipelotrichales	Erysipelotrichaceae	Eggerthia
OTU344	Bacteria	Proteobacteria	Alphaproteobacteria	Rickettsiales	Anaplasmataceae	Ehrlichia
OTU345	Bacteria	Proteobacteria	Gammaproteobacteria	Cellvibrionales	Cellvibrionaceae	Eionea
OTU346	Bacteria	Firmicutes	Clostridia	Clostridiales	Lachnospiraceae	Eisenbergiella
OTU347	Bacteria	Bacteroidota	Flavobacteriia	Flavobacteriales	Weeksellaceae	Elizabethkingia
OTU348	Bacteria	Elusimicrobia	Elusimicrobia	Elusimicrobiales	Elusimicrobiaceae	Elusimicrobium
OTU349	Bacteria	Bacteroidetes	Cytophagia	Cytophagales	Cytophagaceae	Emticicia
OTU350	Bacteria	Proteobacteria	Alphaproteobacteria	Rhodospirillales	Enterobacteriaceae	Endobacter
OTU351	Bacteria	Proteobacteria	Gammaproteobacteria	Oceanospirillales	Endozoicomonadaceae	Endozoicomonas
OTU352	Bacteria	Proteobacteria	Gammaproteobacteria	Pseudomonadales	Moraxellaceae	Enhydrobacter
OTU353	Bacteria	Proteobacteria	Alphaproteobacteria	Rhizobiales	Rhizobiaceae	Ensifer
OTU354	Bacteria	Actinobacteria	Actinobacteria	Micrococcales	Micrococcaceae	Enteractinococcus
OTU355	Bacteria	Proteobacteria	Gammaproteobacteria	Enterobacteriaceae	Enterobacteriaceae	Enterobacter
OTU356	Bacteria	Firmicutes	Bacilli	Lactobacillales	Enterococcaceae	Enterococcus
OTU357	Bacteria	Tenericutes	Mollicutes	Entomoplasmatales	Entomoplasmataceae	Entomoplasma
OTU358	Bacteria	Firmicutes	Bacilli	Lactobacillales	Aerococcaceae	Eremococcus
OTU359	Bacteria	Proteobacteria	Gammaproteobacteria	Enterobacterales	Erwiniaceae	Erwinia
OTU360	Bacteria	Firmicutes	Erysipelotrichia	Erysipelotrichales	Erysipelotrichaceae	Erysipelothrix
OTU361	Bacteria	Firmicutes	Erysipelotrichia	Erysipelotrichales	Erysipelotrichaceae	Erysipelotrichaceae_incertae_sedis
OTU362	Bacteria	Proteobacteria	Alphaproteobacteria	Sphingomonadales	Erythrobacteraceae	Erythrobacter
OTU363	Bacteria	Proteobacteria	Gammaproteobacteria	Enterobacterales	Enterobacteriaceae	Escherichia/Shigella
OTU364	Bacteria	Firmicutes	Clostridia	Clostridiales	Eubacteriaceae	Eubacterium
OTU365	Bacteria	Bacteroidetes	Flavobacteriia	Flavobacteriales	Flavobacteriaceae	Eudoraea
OTU366	Bacteria	Actinobacteria	Nitriliruptoria	Euzebyales	Euzebyaceae	Euzebya
OTU367	Bacteria	Proteobacteria	Gammaproteobacteria	Enterobacterales	Yersiniaceae	Ewingella
OTU368	Bacteria	Firmicutes	Bacilli	Bacillales	Exiguobacterium	Exiguobacterium
OTU369	Bacteria	Firmicutes	Tissierellia	NA	NA	Ezakiella
OTU370	Bacteria	Firmicutes	Bacilli	Lactobacillales	Aerococcaceae	Facklamia
OTU371	Bacteria	Firmicutes	Clostridia	Clostridiales	Ruminococcaceae	Faecalibacterium
OTU372	Bacteria	Firmicutes	Bacilli	Bacillales	Bacillaceae	Falsibacillus
OTU373	Bacteria	Proteobacteria	Alphaproteobacteria	Rhodobacterales	Rhodobacteraceae	Falsirhodobacter
OTU374	Bacteria	Firmicutes	Clostridia	Clostridiales	HungateiClostridiaceae	Fastidiosipila
OTU375	Bacteria	Proteobacteria	Gammaproteobacteria	Pseudomonadales	Moraxellaceae	Faucicola
OTU376	Bacteria	Proteobacteria	Gammaproteobacteria	Alteromonadales	Ferrimonadaceae	Ferrimonas
OTU377	Bacteria	Proteobacteria	Betaproteobacteria	Ferrovales	Ferrovaceae	Ferrovum
OTU378	Bacteria	Thermotogae	Thermotogae	Thermotogales	Fervidobacteriaceae	Fervidobacterium
OTU379	Bacteria	Firmicutes	Bacilli	Bacillales	Bacillaceae	Fictibacillus
OTU380	Bacteria	Firmicutes	Clostridia	Clostridiales	Peptostreptococcaceae	Filifactor
OTU381	Bacteria	Firmicutes	Bacilli	Bacillales	Bacillaceae	Filobacillus
OTU382	Bacteria	Firmicutes	Tissierellia	Tissierellales	Peptoniphilaceae	Finegoldia
OTU383	Bacteria	Bacteroidetes	Cytophagia	Cytophagales	Flammeovirgaceae	Flammeovirga
OTU384	Bacteria	Actinobacteria	Actinobacteria	Actinomycetales	Actinomycetaceae	Flaviflexus
OTU385	Bacteria	Bacteroidetes	Chitinophagia	Chitinophagales	Chitinophagaceae	Flavisolibacter
OTU386	Bacteria	Bacteroidetes	Flavobacteriia	Flavobacteriales	Flavobacteriaceae	Flavobacterium
OTU387	Bacteria	Bacteroidetes	Cytophagia	Cytophagales	Cytophagaceae	Flectobacillus
OTU388	Bacteria	Deferribacteres	Deferribacteres	Deferribacterales	Deferribacteraceae	Flexistipes
OTU389	Bacteria	Actinobacteria	Actinobacteria	Micrococcales	Dermacoccaceae	Flexivirga
OTU390	Bacteria	Actinobacteria	Actinomycetia	Corynebacteriales	NA	Fodinicola
OTU391	Bacteria	Firmicutes	Bacilli	Bacillales	Paenibacillaceae	Fontibacillus
OTU392	Bacteria	Proteobacteria	Gammaproteobacteria	Nevskiales	Sinobacteraceae	Fontimonas
OTU393	Bacteria	Proteobacteria	Betaproteobacteria	Neisseriales	Chromobacteriaceae	Formivibrio
OTU394	Bacteria	Proteobacteria	Gammaproteobacteria	Thiotrichales	Francisellaceae	Francisella
OTU395	Bacteria	Proteobacteria	Gammaproteobacteria	Enterobacterales	Enterobacteriaceae	Franconibacter
OTU396	Bacteria	Actinobacteria	Actinomycetia	Micrococcales	Microbacteriaceae	Frigoribacterium
OTU397	Bacteria	Actinobacteria	Actinobacteria	micrococcales	Microbacteriaceae	Frondihabitans
OTU398	Bacteria	Firmicutes	Bacilli	Lactobacillales	Leuconostocaceae	Fructobacillus
OTU399	Bacteria	Bacteroidota	Cytophagia	Cytophagales	Persicobacteraceae	Fulvitalea
OTU400	Bacteria	Bacteroidota	Cytophagia	Cytophagales	Fulvivirgaceae	Fulvivirga
OTU401	Bacteria	Firmicutes	Clostridia	Clostridiales	Clostridiales Family XII	Fusibacter
OTU402	Bacteria	Firmicutes	Clostridia	Clostridiales	Lachnospiraceae	Fusicatenibacter
OTU403	Bacteria	Fusobacteria	Fusobacteriia	Fusobacteriales	Fusobacteriaceae	Fusobacterium
OTU404	Bacteria	Actinobacteria	Rubrobacteria	Gaiellales	Gaiellaceae	Gaiella
OTU405	Bacteria	Proteobacteria	Gammaproteobacteria	Thiotrichales	Piscirickettsiaceae	Galenea
OTU406	Bacteria	Proteobacteria	Gammaproteobacteria	NA	NA	Gallaecimonas
OTU407	Bacteria	Firmicutes	Tissirellia	Tissierellales	Peptoniphilaceae	Gallicola
OTU408	Bacteria	Proteobacteria	Betaproteobacteria	Nitrosomonadales	Gallionellaceae	Gallionella
OTU409	Bacteria	Actinobacteria	Actinobacteria	Bifidobacteriales	Bifidobacteriaceae	Gardnerella
OTU410	Bacteria	Actinobacteria	Actinomycetia	Micrococcales	Micrococcaceae	Garicola
OTU411	Bacteria	Firmicutes	Clostridia	Clostridiales	Incertae Sedis	Gemella
OTU412	Bacteria	Gemmatimonadetes	Gemmatimonadetes	Gemmatimonadales	Gemmatimonadaceae	Gemmatimonas
OTU413	Bacteria	Firmicutes	Clostridia	Clostridiales	Ruminococcaceae	Gemmiger
OTU414	Bacteria	Proteobacteria	Alphaproteobacteria	Rhodobacterales	Rhodobacteraceae	Gemmobacter
OTU415	Bacteria	Proteobacteria	Deferribacteres	Desulfuromonadales	Geobacteraceae	Geoalkalibacter
OTU416	Bacteria	Firmicutes	Bacilli	Bacillales	Bacillaceae	Geobacillus
OTU417	Bacteria	Proteobacteria	Deltaproteobacteria	Desulfuromonadales	Geobacteraceae	Geobacter
OTU418	Bacteria	Actinobacteria	Actinobacteria	Geodermatophilales	Geodermatophilaceae	Geodermatophilus
OTU419	Bacteria	Firmicutes	Bacilli	Bacillales	NA	Geomicrobium
OTU420	Bacteria	Proteobacteria	Deltaproteobacteria	Desulfuromonadales	Geobacteraceae	Geopsychrobacter
OTU421	Bacteria	Pctinobacteria	Actinobacteria	Micrococcales	Bogoriellaceae	Georgenia
OTU422	Bacteria	Proteobacteria	Alphaproteobacteria	Rickettsiales	Anaplasmataceae	Geothermobacter
OTU423	Bacteria	Firmicutes	Bacilli	Bacillales	Thermoactinomycetaceae	Geothermomicrobium
OTU424	Bacteria	Acidobacteria	Holophagae	Holophagales	Holophagaceae	Geothrix
OTU425	Bacteria	Proteobacteria	Gammaproteobacteria	Enterobacterales	Enterobacteriaceae	Gibbsiella
OTU426	Bacteria	Proteobacteria	Gammaproteobacteria	Cellvibrionales	Cellvibrionaceae	Gilvimarinus
OTU427	Bacteria	Proteobacteria	Gammaproteobacteria	Alteromonadales	Alteromonadaceae	Glaciecola
OTU428	Bacteria	Firmicutes	Bacilli	Lactobacillales	Aerococcaceae	Globicatella
OTU429	Bacteria	Proteobacteria	Alphaproteobacteria	Rhodospirillales	Acetobacteraceae	Gluconacetobacter
OTU430	Bacteria	Proteobacteria	Alphaproteobacteria	Rhodospirillales	Acetobacteraceae	Gluconobacter
OTU431	Bacteria	Actinobacteria	Actinobacteria	Glycomycetales	Glycomycetaceae	Glycomyces
OTU432	Bacteria	Actinobacteria	Actinobacteria	Corynebacteriales	Gordoniaceae	Gordonia
OTU433	Bacteria	Actinobacteria	Coriobacteriia	Eggerthellales	Eggerthellaceae	Gordonibacter
OTU434	Bacteria	Firmicutes	Bacilli	Bacillales	Bacillaceae	Gracilibacillus
OTU435	Bacteria	Firmicutes	Bacilli	Lactobacillales	Carnobacteriaceae	Granulicatella
OTU436	Bacteria	Actinobacteria	Actinobacteria	Propionibacteriales	Propionibacteriaceae	Granulicoccus
OTU437	Bacteria	Actinobacteria	Actinobacteria	Micrococcales	Microbacteriaceae	Gryllotalpicola
OTU438	Bacteria	Actinobacteria	Actinobacteria	Micrococcales	Microbacteriaceae	Gulosibacter
OTU439	Bacteria	Proteobacteria	Gammaproteobacteria	Oceanospirillales	Saccharospirillaceae	Gynuella
OTU440	Bacteria	Proteobacteria	Alphaproteobacteria	Rhodobacterales	Rhodobacteraceae	Haematobacter
OTU441	Bacteria	Proteobacteria	Gammaproteobacteria	Pasteurellales	Pasteurellaceae	Haemophilus
OTU442	Bacteria	Proteobacteria	Gammaproteobacteria	Enterobacterales	Hafniaceae	Hafnia
OTU443	Bacteria	Proteobacteria	Gammaproteobacteria	Oceanospirillales	Hahellaceae	Hahella
OTU444	Bacteria	Firmicutes	Bacilli	Bacillales	Bacillaceae	Halalkalibacillus
OTU445	Bacteria	Firmicutes	Clostridia	Halanaerobiales	Halobacteroidaceae	Halanaerobacter
OTU446	Bacteria	Firmicutes	Clostridia	Halanaerobiales	Halobacteroidaceae	Halanaerobaculum
OTU447	Bacteria	Firmicutes	Clostridia	Halanaerobiales	Halanaerobiaceae	Halanaerobium
OTU448	Bacteria	Proteobacteria	Deltaproteobacteria	Myxococcales	Kofleriaceae	Haliangium
OTU449	Bacteria	Proteobacteria	Gammaproteobacteria	Cellvibrionales	Halieaceae	Haliea
OTU450	Bacteria	Proteobacteria	Gammaproteobacteria	Cellvibrionales	Halieaceae	Halioglobus
OTU451	Bacteria	Firmicutes	Bacilli	Bacillales	Bacillaceae	Halobacillus
OTU452	Bacteria	Proteobacteria	Oligoflexia	Bacteriovoracales	Halobacteriovoraceae	Halobacteriovorax
OTU453	Bacteria	Firmicutes	Clostridia	Halanaerobiales	Halobacteroidaceae	Halobacteroides
OTU454	Bacteria	Proteobacteria	Gammaproteobacteria	Chromatiales	Chromatiaceae	Halochromatium
OTU455	Bacteria	Firmicutes	Bacilli	Bacillales	Bacillaceae	Halolactibacillus
OTU456	Bacteria	Proteobacteria	Gammaproteobacteria	Oceanospirillales	Halomonadaceae	Halomonas
OTU457	Bacteria	Firmicutes	Clostridia	Halanaerobiales	Halobacteroidaceae	Halonatronum
OTU458	Bacteria	NA	NA	Haloplasmatales	Haloplasmataceae	Haloplasma
OTU459	Bacteria	Proteobacteria	Gammaproteobacteria	Chromatiales	Ectothiorhodospiraceae	Halorhodospira
OTU460	Bacteria	Proteobacteria	Gammaproteobacteria	NA	NA	Halospina
OTU461	Bacteria	Firmicutes	Clostridia	Clostridiales	Clostridiaceae	Hathewaya
OTU462	Bacteria	Firmicutes	Bacilli	Bacillales	Thermoactinomycetaceae	Hazenella
OTU463	Bacteria	Actinobacteria	Actinobacteria	Micrococcales	Dermabacteraceae	Helcobacillus
OTU464	Bacteria	Firmicutes	Tissierellia	Tissierellales	Peptoniphilaceae	Helcococcus
OTU465	Bacteria	Proteobacteria	Epsilonproteobacteria	Campylobacterales	Helicobacteraceae	Helicobacter
OTU466	Bacteria	Firmicutes	Clostridia	Clostridiales	Helicobacteraceae	Heliobacterium
OTU467	Bacteria	Firmicutes	Clostridia	Clostridiales	Helicobacteraceae	Heliophilum
OTU468	Bacteria	Firmicutes	Clostridia	Clostridiales	Heliobacteriaceae	Heliorestis
OTU469	Bacteria	Proteobacteria	Alphaproteobacteria	Rhodobacterales	Hyphomonadaceae	Henriciella
OTU470	Bacteria	Proteobacteria	Betaproteobacteria	Burkholderiales	Oxalobacteraceae	Herbaspirillum
OTU471	Bacteria	Actinobacteria	Actinobacteria	Micrococcales	Microbacteriaceae	Herbiconiux
OTU472	Bacteria	Proteobacteria	Alphaproteobacteria	Rhizobiales	Phyllobacteriaceae	Hoeflea
OTU473	Bacteria	Proteobacteria	Erysipelotrichia	Erysipelotrichales	Erysipelotrichaceae	Holdemania
OTU474	Bacteria	Actinobacteria	Actinobacteria	Micrococcales	Microbacteriaceae	Homoserinimonas
OTU475	Bacteria	Firmicutes	Clostridia	Eubacteriales	NA	Howardella
OTU476	Bacteria	Proteobacteria	Gammaproteobacteria	Nevskiales	Sinobacteraceae	Hydrocarboniphaga
OTU477	Bacteria	Firmicutes	Bacilli	Bacillales	Bacillaceae	Hydrogenibacillus
OTU478	Bacteria	Proteobacteria	Epsilonproteobacteria	Campylobacterales	Hydrogenimonaceae	Hydrogenimonas
OTU479	Bacteria	Firmicutes	NA	NA	NA	Hydrogenispora
OTU480	Bacteria	Aquificae	Aquificae	Aquificales	Aquificaceae	Hydrogenivirga
OTU481	Bacteria	Bacteroidetes	Cytophagia	Cytophagales	Hymenobacteraceae	Hymenobacter
OTU482	Bacteria	Proteobacteria	Alphaproteobacteria	Rhizobiales	Hyphomicrobiaceae	Hyphomicrobium
OTU483	Bacteria	Actinobacteria	Acidimicrobiia	Acidimicrobiales	Iamiaceae	Iamia
OTU484	Bacteria	Proteobacteria	Gammaproteobacteria	Alteromonadales	Idiomarinaceae	Idiomarina
OTU485	Bacteria	Firmicutes	Bacilli	Lactobacillales	Aerococcaceae	Ignavigranum
OTU486	Bacteria	Actinobacteria	Acidimicrobiia	Acidimicrobiales	Ilumatobacteraceae	Ilumatobacter
OTU487	Bacteria	Proteobacteria	Alphaproteobacteria	Rhodospirillales	Rhodospirillaceae	Insolitispirillum
OTU488	Bacteria	Firmicutes	Clostridia	Eubacteriales	Peptostreptococcaceae	Intestinibacter
OTU489	Bacteria	Firmicutes	Clostridia	Clostridiales	NA	Intestinimonas
OTU490	Bacteria	Actinobacteria	Actinobacteria	Micrococcales	Intrasporangiaceae	Intrasporangium
OTU491	Bacteria	Firmicutes	Bacilli	Lactobacillales	carnobacteriaceae	Isobaculum
OTU492	Bacteria	Actinobacteria	Actinobacteria	Micrococcales	Promicromonosporaceae	Isoptericola
OTU493	Bacteria	Actinobacteria	Actinobacteria	Micrococcales	Intrasporangiaceae	Janibacter
OTU494	Bacteria	Proteobacteria	Alphaproteobacteria	rhodobacterales	Rhodobacteraceae	Jannaschia
OTU495	Bacteria	Actinobacteria	Actinobacteria	Frankiales	NA	Jatrophihabitans
OTU496	Bacteria	Proteobacteria	Betaproteobacteria	Neisseriales	Chromobacteriaceae	Jeongeupia
OTU497	Bacteria	Firmicutes	Bacilli	Bacillales	Planococcaceae	Jeotgalibacillus
OTU498	Bacteria	Firmicutes	Bacilli	Bacillales	Staphylococcaceae	Jeotgalicoccus
OTU499	Bacteria	Actinobacteria	Actinobacteria	Jiangellales	Jiangellaceae	Jiangella
OTU500	Bacteria	Actinobacteria	Actinobacteria	Micrococcales	Jonesiaceae	Jonesia
OTU501	Bacteria	Proteobacteria	Alphaproteobacteria	Rhizobiales	Rhizobiaceae	Kaistia
OTU502	Bacteria	Firmicutes	Erysipelotrichia	Erysipelotrichales	Erysipelotrichaceae	Kandleria
OTU503	Bacteria	Proteobacteria	Betaproteobacteria	Burkholderiales	Alcaligenaceae	Kangiella
OTU504	Bacteria	Proteobacteria	Alphaproteobacteria	Kiloniellales	Kiloniellaceae	Kerstersia
OTU505	Bacteria	Actinobacteria	Actinobacteria	Kineosporiales	Kineosporiaceae	Kineococcus
OTU506	Bacteria	Actinobacteria	Actinomycetia	Micrococcales	Dermatophilaceae	Kineosphaera
OTU507	Bacteria	Actinobacteria	Actinobacteria	Kineosporiales	Kineosporiaceae	Kineosporia
OTU508	Bacteria	Proteobacteria	Gammaproteobacteria	Oceanospirillales	Endozoicomonadaceae	Kistimonas
OTU509	Bacteria	Actinobacteria	Actinobacteria	Streptomycetales	Streptomycetaceae	Kitasatospora
OTU510	Bacteria	Proteobacteria	Gammaproteobacteria	Enterobacterales	Enterobacteriaceae	Klebsiella
OTU511	Bacteria	Actinobacteria	Actinobacteria	Micrococcales	Microbacteriaceae	Klugiella
OTU512	Bacteria	Proteobacteria	Gammaproteobacteria	Enterobacterales	Enterobacteriaceae	Kluyvera
OTU513	Bacteria	Actinobacteria	Actinobacteria	Micrococcales	Intrasporangiaceae	Knoellia
OTU514	Bacteria	Actinobacteria	Actinobacteria	Micrococcales	Micrococcaceae	Kocuria
OTU515	Bacteria	Proteobacteria	Deltaproteobacteria	Myxococcales	Nannocystineae	Kofleria
OTU516	Bacteria	Proteobacteria	Alphaproteobacteria	Rhodospirillales	Acetobacteraceae	Komagataeibacter
OTU517	Bacteria	Proteobacteria	Alphaproteobacteria	Kordiimonadales	Kordiimonadaceae	Kordiimonas
OTU518	Bacteria	Proteobacteria	Gammaproteobacteria	Enterobacterales	Enterobacteriaceae	Kosakonia
OTU519	Bacteria	Actinobacteria	Actinobacteria	Propionibacteriales	Nocardioidaceae	Kribbella
OTU520	Bacteria	Firmicutes	Bacilli	Bacillales	Planococcaceae	Kurthia
OTU521	Bacteria	Proteobacteria	Gammaproteobacteria	Oceanospirillales	Halomonadaceae	Kushneria
OTU522	Bacteria	Firmicutes	Bacilli	Bacillales	Alicyclobacillaceae	Kyrpidia
OTU523	Bacteria	Actinobacteria	Actinobacteria	Micrococcales	Dermacoccaceae	Kytococcus
OTU524	Bacteria	Actinobacteria	Actinobacteria	Micrococcales	Microbacteriaceae	Labedella
OTU525	Bacteria	Proteobacteria	Alphaproteobacteria	NA	NA	Labrys
OTU526	Bacteria	Actinobacteria	Actinobacteria	Micrococcales	Microbacteriaceae	Laceyella
OTU527	Bacteria	Firmicutes	Clostridia	Clostridiales	Lachnospiraceae	Lachnoanaerobaculum
OTU528	Bacteria	Firmicutes	Clostridia	Clostridiales	Eubacteriaceae	Lachnospiracea_incertae_sedis
OTU529	Bacteria	Firmicutes	bacilli	Lactobacillales	Carnobacteriaceae	Lacticigenium
OTU530	Bacteria	Firmicutes	Bacilli	Lactobacillales	Lactobacillaceae	Lactobacillus
OTU531	Bacteria	Firmicutes	Bacilli	Lactobacillales	Streptococcaceae	Lactococcus
OTU532	Bacteria	Firmicutes	Bacilli	Lactobacillales	Streptococcaceae	Lactovum
OTU533	Bacteria	Proteobacteria	Gammaproteobacteria	Chromatiales	Chromatiaceae	Lamprocystis
OTU534	Bacteria	Bacteroidota	Cytophagia	Cytophagales	Spirosomaceae	Larkinella
OTU535	Bacteria	Candidatus Latescibacteria	NA	NA	NA	Latescibacteria_genera_incertae_sedis
OTU536	Bacteria	Proteobacteria	Betaproteobacteria	Burkholderiales	Burkholderiaceae	Lautropia
OTU537	Bacteria	Proteobacteria	Deltaproteobacteria	Desulfovibrionales	Desulfovibrionaceae	Lawsonia
OTU538	Bacteria	Proteobacteria	Epsilonproteobacteria	Nautiliales	Nautiliaceae	Lebetimonas
OTU539	Bacteria	Proteobacteria	Gammaproteobacteria	Legionellales	Legionellaceae	Legionella
OTU540	Bacteria	Actinobacteria	Actinobacteria	Micrococcales	Microbacteriaceae	Leifsonia
OTU541	Bacteria	Proteobacteria	Gammaproteobacteria	Enterobacterales	Budviciaceae	Leminorella
OTU542	Bacteria	Firmicutes	Bacilli	Bacillales	Bacillaceae	Lentibacillus
OTU543	Bacteria	Lentisphaerae	Lentisphaeria	Lentisphaerales	Lentisphaeraceae	Lentisphaera
OTU544	Bacteria	Actinobacteria	Actinobacteria	Pseudonocardiales	Pseudonocardiaceae	Lentzea
OTU545	Bacteria	Chloroflexi	Anaerolineae	Anaerolineales	Anaerolineaceae	Leptolinea
OTU546	Bacteria	Spirochaetes	Spirochaetia	Leptospirales	Leptospiraceae	Leptonema
OTU547	Bacteria	Spirochaetes	Spirochaetia	Leptospirales	Leptospiraceae	Leptospira
OTU548	Bacteria	Proteobacteria	Betaproteobacteria	Burkholderiales	NA	Leptothrix
OTU549	Bacteria	Actinobacteria	Actinobacteria	Micrococcales	Microbacteriaceae	Leucobacter
OTU550	Bacteria	Firmicutes	Bacilli	Lactobacillales	Leuconostocacaea	Leuconostoc
OTU551	Bacteria	Bacteroidota	Saprospiria	Saprospirales	Lewinellaceae	Lewinella
OTU552	Bacteria	Verrucomicrobia	Verrucomicrobiae	Verrucomicrobiales	NA	Limisphaera
OTU553	Bacteria	Proteobacteria	Betaproteobacteria	Burkholderiales	Burkholderiaceae	Limnobacter
OTU554	Bacteria	Bacteroidota	Flavobacteriia	Flavobacteriales	Crocinitomicaceae	Lishizhenia
OTU555	Bacteria	Firmicutes	Bacilli	Bacillales	Listeriaceae	Listeria
OTU556	Bacteria	Proteobacteria	Gammaproteobacteria	Oceanospirillales	Oceanospirillaceae	Litoribacillus
OTU557	Bacteria	Proteobacteria	Gammaproteobacteria	Oceanospirillales	Oceanospirillaceae	Litoribrevibacter
OTU558	Bacteria	Proteobacteria	Gammaproteobacteria	NA	NA	Litorivivens
OTU559	Bacteria	Actinobacteria	Actinomycetia	Pseudonocardiales	Pseudonocardiaceae	Longimycelium
OTU560	Bacteria	Proteobacteria	Gammaproteobacteria	Enterobacterales	Pectobacteriaceae	Lonsdalea
OTU561	Bacteria	Proteobacteria	Gammaproteobacteria	Xanthomonadales	Rhodanobacteraceae	Luteibacter
OTU562	Bacteria	Actinobacteria	Actinobacteria	Micrococcales	NA	Luteimicrobium
OTU563	Bacteria	Proteobacteria	Gammaproteobacteria	Xanthomonadales	Xanthomonadaceae	Luteimonas
OTU564	Bacteria	Actinobacteria	Actinobacteria	Micrococcales	Dermacoccaceae	Luteipulveratus
OTU565	Bacteria	Actinobacteria	Actinobacteria	Propionibacteriales	Propionibacteriaceae	Luteococcus
OTU566	Bacteria	Firmicutes	Bacilli	Bacillales	Bacillaceae	Lysinibacillus
OTU567	Bacteria	Actinobacteria	Actinobacteria	Micrococcales	Demequinaceae	Lysinimicrobium
OTU568	Bacteria	Proteobacteria	Gammaproteobacteria	Xanthomonadales	Xanthomonadaceae	Lysobacter
OTU569	Bacteria	Firmicutes	Bacilli	Bacillales	Staphylococcaceae	Macrococcus
OTU570	Bacteria	Proteobacteria	Gammaproteobacteria	Enterobacterales	Enterobacteriaceae	Mangrovibacter
OTU571	Bacteria	Proteobacteria	Alphaproteobacteria	Rhodobacterales	Hyphomonadaceae	Maricaulis
OTU572	Bacteria	Proteobacteria	Gammaproteobacteria	Chromatiales	Chromatiaceae	Marichromatium
OTU573	Bacteria	Actinobacteria	Actinomycetia	Streptosporangiales	Nocardiopsaceae	Marinactinospora
OTU574	Bacteria	Firmicutes	Bacilli	Lactobacillales	carnobacteriaceae	Marinilactibacillus
OTU575	Bacteria	Actinobacteria	Actinobacteria	Propionibacteriales	Propionibacteriacea	Mariniluteicoccus
OTU576	Bacteria	Proteobacteria	Gammaproteobacteria	Cellvibrionales	Cellvibrionaceae	Marinimicrobium
OTU577	Bacteria	Firmicutes	Bacilli	Bacillales	Thermoactinomycetaceae	Marininema
OTU578	Bacteria	Thermotogae	Thermotogae	Petrotogales	Petrotogaceae	Marinitoga
OTU579	Bacteria	Proteobacteria	Gammaproteobacteria	Alteromonadales	Alteromonadaceae	Marinobacter
OTU580	Bacteria	Proteobacteria	Gammaproteobacteria	Oceanospirillales	Oceanospirillaceae	Marinobacterium
OTU581	Bacteria	Firmicutes	Bacilli	Bacillales	Bacillaceae	Marinococcus
OTU582	Bacteria	Proteobacteria	Gammaproteobacteria	Oceanospirillales	Oceanospirillaceae	Marinomonas
OTU583	Bacteria	Proteobacteria	Gammaproteobacteria	Oceanospirillales	Oceanospirillaceae	Marinospirillum
OTU584	Bacteria	Firmicutes	Clostridia	Eubacteriales	Lachnospiraceae	Marvinbryantia
OTU585	Bacteria	Proteobacteria	Betaproteobacteria	Burkholderiales	Oxalobacteraceae	Massilia
OTU586	Bacteria	Firmicutes	Negativicutes	Selenomonadales	Selenomonadaceae	Megamonas
OTU587	Bacteria	Proteobacteria	Alphaproteobacteria	Rhizobiales	Methylobacteriaceae	Meganema
OTU588	Bacteria	Firmicutes	Negativicutes	Veillonellales	Veillonellaceae	Megasphaera
OTU589	Bacteria	Firmicutes	Bacilli	Bacillales	Bacillaceae	Melghiribacillus
OTU590	Bacteria	Firmicutes	Bacilli	Bacillales	Thermoactinomycetaceae	Melghirimyces
OTU591	Bacteria	Firmicutes	Bacilli	Lactobacillales	Enterococcaceae	Melissococcus
OTU592	Bacteria	Tenericutes	Mollicutes	Entomoplasmatales	Entomoplasmataceae	Mesoplasma
OTU593	Bacteria	Proteobacteria	Alphaproteobacteria	Rhizobiales	Phyllobacteriaceae	Mesorhizobium
OTU594	Bacteria	Proteobacteria	Alphaproteobacteria	Rhodobacterales	Rhodobacteraceae	Methylarcula
OTU595	Bacteria	Proteobacteria	Betaproteobacteria	Nitrosomonadales	Methylophilaceae	Methylobacillus
OTU596	Bacteria	Proteobacteria	Gammaproteobacteria	Methylococcales	Methylococcaceae	Methylobacter
OTU597	Bacteria	Proteobacteria	Alphaproteobacteria	Rhizobiales	Methylobacteriaceae	Methylobacterium
OTU598	Bacteria	Proteobacteria	Gammaproteobacteria	Methylococcales	Methylococcaceae	Methylocaldum
OTU599	Bacteria	Proteobacteria	Gammaproteobacteria	Methylococcales	Methylococcaceae	Methylogaea
OTU600	Bacteria	Proteobacteria	Gammaproteobacteria	Methylococcales	Methylothermaceae	Methylohalobius
OTU601	Bacteria	Proteobacteria	Gammaproteobacteria	Methylococcales	Methylococcaceae	Methylomarinovum
OTU602	Bacteria	Proteobacteria	Gammaproteobacteria	Methylococcales	Methylococcaceae	Methylomicrobium
OTU603	Bacteria	Proteobacteria	Gammaproteobacteria	Methylococcales	Methylococcaceae	Methylomonas
OTU604	Bacteria	Proteobacteria	Gammaproteobacteria	Methylococcales	Methylococcaceae	Methyloparacoccus
OTU605	Bacteria	Proteobacteria	Gammaproteobacteria	Thiotrichales	Piscirickettsiaceae	Methylophaga
OTU606	Bacteria	Proteobacteria	Gammaproteobacteria	Methylococcales	Methylococcaceae	Methyloprofundus
OTU607	Bacteria	Proteobacteria	Gammaproteobacteria	Methylococcales	Methylococcaceae	Methylosarcina
OTU608	Bacteria	Proteobacteria	Gammaproteobacteria	Methylococcales	Methylothermaceae	Methylothermus
OTU609	Bacteria	Proteobacteria	Gammaproteobacteria	Methylococcales	Methylococcaceae	Methylovulum
OTU610	Bacteria	Firmicutes	Bacilli	Bacillales	Bacillaceae	Microaerobacter
OTU611	Bacteria	Actinobacteria	Actinobacteria	Micrococcales	Microbacteriaceae	Microbacterium
OTU612	Bacteria	Proteobacteria	Gammaproteobacteria	Cellvibrionales	Microbulbiferaceae	Microbulbifer
OTU613	Bacteria	Actinobacteria	Actinobacteria	Micrococcales	Microbacteriaceae	Microcella
OTU614	Bacteria	Actinobacteria	Micrococcales	Micrococcaceae	Micrococcus	Micrococcus
OTU615	Bacteria	NA	NA	NA	NA	Microgenomates_genera_incertae_sedis
OTU616	Bacteria	Actinobacteria	Actinobacteria	Propionibacteriales	Propionibacteriaceae	Microlunatus
OTU617	Bacteria	Actinobacteria	Actinobacteria	Micromonosporales	Micromonosporaceae	Micromonospora
OTU618	Bacteria	Actinobacteria	Actinobacteria	Propionibacteriales	Nocardioidaceae	Micropruina
OTU619	Bacteria	Proteobacteria	Alphaproteobacteria	Rhizobiales	Methylobacteriaceae	Microvirga
OTU620	Bacteria	Actinobacteria	Actinobacteria	Corynebacteriales	Gordoniaceae	Millisia
OTU621	Bacteria	Firmicutes	Negativicutes	Selenomonadales	Selenomonadaceae	Mitsuokella
OTU622	Bacteria	Actinobacteria	Actinobacteria	Micrococcales	Dermatophilaceae	Mobilicoccus
OTU623	Bacteria	Actinobacteria	Actinobacteria	Actinomycetales	Actinomycetaceae	Mobiluncus
OTU624	Bacteria	Actinobacteria	Actinobacteria	Geodermatophilales	Geodermatophilaceae	Modestobacter
OTU625	Bacteria	Proteobacteria	Gammaproteobacteria	Geodermatophilales	Morganellaceae	Moellerella
OTU626	Bacteria	Firmicutes	Clostridia	Clostridiales	Clostridiales Family XIII	Mogibacterium
OTU627	Bacteria	Firmicutes	Clostridia	Thermoanaerobacterales	Thermoanaerobacteraceae	Moorella
OTU628	Bacteria	Proteobacteria	Gammaproteobacteria	Pseudomonadales	Moraxellaceae	Moraxella
OTU629	Bacteria	Proteobacteria	Gammaproteobacteria	Pseudomonadales	Moraxellaceae	Morganella
OTU630	Bacteria	Proteobacteria	Gammaproteobacteria	Alteromonadales	Moritellaceae	Moritella
OTU631	Bacteria	Bacteroidetes	Sphingobacteriia	Sphingobacteriales	Sphingobacteriaceae	Mucilaginibacter
OTU632	Bacteria	Deferribacteres	Deferribacteres	Deferribacterales	Deferribacteraceae	Mucispirillum
OTU633	Bacteria	Actinobacteria	Actinobacteria	Propionibacteriales	Nocardioidaceae	Mumia
OTU634	Bacteria	Firmicutes	Tissierellia	Tissierellales	Peptoniphilaceae	Murdochiella
OTU635	Bacteria	Bacteroidetes	Flavobacteriia	Flavobacteriales	Flavobacteriaceae	Muriicola
OTU636	Bacteria	Bacteroidetes	Flavobacteriia	Flavobacteriales	Flavobacteriaceae	Mycetocola
OTU637	Bacteria	Actinobacteria	Actinomycetales	Corynebacterineae	Mycobacteriaceae	Mycobacterium
OTU638	Bacteria	Tenericutes	Mollicutes	Mycoplasmatales	Mycoplasmataceae	Mycoplasma
OTU639	Bacteria	Actinobacteria	Actinobacteria	Micrococcales	Microbacteriaceae	Naasia
OTU640	Bacteria	Proteobacteria	Deltaproteobacteria	Myxococcales	Nannocystaceae	Nannocystis
OTU641	Bacteria	Firmicutes	Clostridia	Natranaerobiales	Natranaerobiaceae	Natranaerobius
OTU642	Bacteria	Firmicutes	Bacilli	Bacillales	Bacillaceae	Natribacillus
OTU643	Bacteria	Firmicutes	Clostridia	Halanaerobiales	Halobacteroidaceae	Natroniella
OTU644	Bacteria	Firmicutes	Clostridia	Eubacteriales	Clostridiaceae	Natronincola
OTU645	Bacteria	Firmicutes	Bacilli	Bacillales	Bacillaceae	Natronobacillus
OTU646	Bacteria	Proteobacteria	Gammaproteobacteria	Chromatiales	Ectothiorhodospiraceae	Natronocella
OTU647	Bacteria	Firmicutes	Negativicutes	Veillonellales	Veillonellaceae	Negativicoccus
OTU648	Bacteria	Proteobacteria	Betaproteobacteria	Neisseriales	Neisseriaceae	Neisseria
OTU649	Bacteria	Proteobacteria	Alphaproteobacteria	Rhodospirillales	Acetobacteraceae	Neoasaia
OTU650	Bacteria	Chlamydiae	Chlamydiia	Parachlamydiales	Parachlamydiaceae	Neochlamydia
OTU651	Bacteria	Proteobacteria	Alphaproteobacteria	Rickettsiales	Anaplasmataceae	Neorickettsia
OTU652	Bacteria	Proteobacteria	Gammaproteobacteria	Oceanospirillales	Oceanospirillaceae	Neptuniibacter
OTU653	Bacteria	Proteobacteria	Gammaproteobacteria	Oceanospirillales	Oceanospirillaceae	Neptunomonas
OTU654	Bacteria	Actinobacteria	Actinobacteria	Micrococcales	Micrococcaceae	Nesterenkonia
OTU655	Bacteria	Proteobacteria	Gammaproteobacteria	Nevskiales	Sinobacteraceae	Nevskia
OTU656	Bacteria	Proteobacteria	Alphaproteobacteria	Rhodospirillales	Acetobacteraceae	Nguyenibacter
OTU657	Bacteria	Bacteroidetes	Chitinophagia	Chitinophagales	Chitinophagaceae	Niabella
OTU658	Bacteria	Proteobacteria	Alphaproteobacteria	Rhodospirillales	Thalassobaculaceae	Nisaea
OTU659	Bacteria	Proteobacteria	Gammaproteobacteria	Oceanospirillales	Oceanospirillaceae	Nitrincola
OTU660	Bacteria	Proteobacteria	Gammaproteobacteria	Chromatiales	Chromatiaceae	Nitrococcus
OTU661	Bacteria	Proteobacteria	Gammaproteobacteria	Chromatiales	Chromatiaceae	Nitrosococcus
OTU662	Bacteria	Proteobacteria	Betaproteobacteria	Nitrosomonadales	Nitrosomonadaceae	Nitrosomonas
OTU663	Bacteria	Proteobacteria	Betaproteobacteria	Nitrosomonadales	Nitrosomonadaceae	Nitrosospira
OTU664	Bacteria	Nitrospirae	Nitrospira	Nitrospirales	Nitrospiraceae	Nitrospira
OTU665	Bacteria	Actinobacteria	Actinobacteria	Corynebacteriales	Nocardiaceae	Nocardia
OTU666	Bacteria	Actinobacteria	Actinobacteria	Propionibacteriales	Nocardioidaceae	Nocardioides
OTU667	Bacteria	Actinobacteria	Actinobacteria	Streptosporangiales	Nocardiopsaceae	Nocardiopsis
OTU668	Bacteria	Actinobacteria	Actinobacteria	Streptosporangiales	Streptosporangiaceae	Nonomuraea
OTU669	Bacteria	Firmicutes	Bacilli	Bacillales	Staphylococcaceae	Nosocomiicoccus
OTU670	Bacteria	Proteobacteria	Alphaproteobacteria	Rhodospirillales	Rhodospirillaceae	Novispirillum
OTU671	Bacteria	Proteobacteria	Alphaproteobacteria	Sphingomonadales	Sphingomonadaceae	Novosphingobium
OTU672	Bacteria	Proteobacteria	Alphaproteobacteria	Rhodobacterales	Roseobacteraceae	Oceanicola
OTU673	Bacteria	Proteobacteria	Gammaproteobacteria	Aeromonadales	Aeromonadaceae	Oceanimonas
OTU674	Bacteria	Firmicutes	Clostridia	Clostridiales	Clostridiaceae	Oceanirhabdus
OTU675	Bacteria	Proteobacteria	Gammaproteobacteria	Oceanospirillales	Oceanospirillaceae	Oceaniserpentilla
OTU676	Bacteria	Proteobacteria	Gammaproteobacteria	Aeromonadales	Aeromonadaceae	Oceanisphaera
OTU677	Bacteria	Firmicutes	Bacilli	Bacillales	Bacillaceae	Oceanobacillus
OTU678	Bacteria	Proteobacteria	Gammaproteobacteria	Chromatiales	Ectothiorhodospiraceae	Oceanococcus
OTU679	Bacteria	Proteobacteria	Gammaproteobacteria	Oceanospirillales	Oceanospirillaceae	Oceanospirillum
OTU680	Bacteria	Proteobacteria	Alphaproteobacteria	Rhizobiales	Brucellaceae	Ochrobactrum
OTU681	Bacteria	Firmicutes	Bacilli	Lactobacillales	Lactobacillaceae	Oenococcus
OTU682	Bacteria	Proteobacteria	Gammaproteobacteria	Oceanospirillales	Oceanospirillaceae	Oleibacter
OTU683	Bacteria	Proteobacteria	Gammaproteobacteria	Oceanospirillales	Oceanospirillaceae	Oleispira
OTU684	Bacteria	Proteobacteria	Betaproteobacteria	Burkholderiales	Alcaligenaceae	Oligella
OTU685	Bacteria	Proteobacteria	Oligoflexia	Oligoflexales	Oligoflexaceae	Oligoflexus
OTU686	Bacteria	Actinobacteria	Coriobacteriia	Coriobacteriales	Atopobiaceae	Olsenella
OTU687	Bacteria	Proteobacteria	Gammaproteobacteria	Orbales	Orbaceae	Orbus
OTU688	Bacteria	Firmicutes	Clostridia	Halanaerobiales	Halobacteroidaceae	Orenia
OTU689	Bacteria	Firmicutes	Clostridia	Clostridiales	Lachnospiraceae	Oribacterium
OTU690	Bacteria	Alphaproteobacteria	Rickettsiales	Rickettsiaceae	Rickettsieae	Orientia
OTU691	Bacteria	Chloroflexi	Anaerolineae	Anaerolineales	Anaerolineaceae	Ornatilinea
OTU692	Bacteria	Firmicutes	Bacilli	Bacillales	Bacillaceae	Ornithinibacillus
OTU693	Bacteria	Actinobacteria	Actinobacteria	Micrococcales	Intrasporangiaceae	Ornithinibacter
OTU694	Bacteria	Actinobacteria	Actinobacteria	Micrococcales	Intrasporangiaceae	Ornithinimicrobium
OTU695	Bacteria	Firmicutes	Clostridia	Clostridiales	Oscillospiraceae	Oscillibacter
OTU696	Bacteria	Chloroflexi	Chloroflexia	Chloroflexales	Oscillochloridaceae	Oscillochloris
OTU697	Bacteria	Proteobacteria	Betaproteobacteria	Burkholderiales	Comamonadaceae	Ottowia
OTU698	Bacteria	Firmicutes	Bacilli	Bacillales	Paenibacillaceae	Oxalophagus
OTU699	Bacteria	Firmicutes	Clostridia	Eubacteriales	Clostridiaceae	Oxobacter
OTU700	Bacteria	Proteobacteria	Betaproteobacteria	Burkholderiales	Alcaligenaceae	Paenalcaligenes
OTU701	Bacteria	Firmicutes	Bacilli	Bacillales	Paenibacillaceae	Paenibacillus
OTU702	Bacteria	Firmicutes	Bacilli	Bacillales	Planococcaceae	Paenisporosarcina
OTU703	Bacteria	Proteobacteria	Gammaproteobacteria	Enterobacterales	Erwiniaceae	Pantoea
OTU704	Bacteria	Firmicutes	Clostridia	Eubacteriales	Oscillospiraceae	Papillibacter
OTU705	Bacteria	Bacteroidota	Bacteroidia	Bacteroidales	Tannerellaceae	Parabacteroides
OTU706	Bacteria	Proteobacteria	Alphaproteobacteria	Rhodobacterales	Rhodobacteraceae	Paracoccus
OTU707	Bacteria	Proteobacteria	Gammaproteobacteria	Alteromonadales	Ferrimonadaceae	Paraferrimonas
OTU708	Bacteria	Proteobacteria	Gammaproteobacteria	Alteromonadales	Alteromonadaceae	Paraglaciecola
OTU709	Bacteria	Firmicutes	Bacilli	Bacillales	Bacillaceae	Paraliobacillus
OTU710	Bacteria	Proteobacteria	Gammaproteobacteria	Alteromonadales	Moritellaceae	Paramoritella
OTU711	Bacteria	Proteobacteria	Gammaproteobacteria	Moraxellales	Moraxellaceae	Paraperlucidibaca
OTU712	Bacteria	Bacteroidetes	Bacteroidia	Bacteroidales	Prevotellaceae	Paraprevotella
OTU713	Bacteria	Proteobacteria	Betaproteobacteria	Burkholderiales	Alcaligenaceae	Parapusillimonas
OTU714	Bacteria	Proteobacteria	Betaproteobacteria	Burkholderiales	Sutterellaceae	Parasutterella
OTU715	Bacteria	NA	NA	NA	NA	Parcubacteria_genera_incertae_sedis
OTU716	Bacteria	Proteobacteria	Alphaproteobacteria	Rhizobiales	Rhodobiaceae	Parvibaculum
OTU717	Bacteria	Proteobacteria	Alphaproteobacteria	Parvularculales	Parvularculaceae	Parvularcula
OTU718	Bacteria	Proteobacteria	Gammaproteobacteria	Pasteurellales	Pasteurellaceae	Pasteurella
OTU719	Bacteria	Firmicutes	Bacilli	Bacillales	Bacillaceae	Paucisalibacillus
OTU720	Bacteria	Proteobacteria	Gammaproteobacteria	Enterobacterales	Pectobacteriaceae	Pectobacterium
OTU721	Bacteria	Firmicutes	Bacilli	Lactobacillales	Lactobacillaceae	Pediococcus
OTU722	Bacteria	Bacteroidetes	Sphingobacteriia	Sphingobacteriales	Sphingobacteriaceae	Pedobacter
OTU723	Bacteria	Proteobacteria	Alphaproteobacteria	Rhizobiales	Hyphomicrobiaceae	Pelagibacterium
OTU724	Bacteria	Verrucomicrobia	Opitutae	Puniceicoccales	Puniceicoccaceae	Pelagicoccus
OTU725	Bacteria	Proteobacteria	Betaproteobacteria	Burkholderiales	Alcaligenaceae	Pelistega
OTU726	Bacteria	Proteobacteria	Deltaproteobacteria	Desulfuromonadales	Desulfuromonadaceae	Pelobacter
OTU727	Bacteria	Chloroflexi	Anaerolineae	Anaerolineales	Anaerolineaceae	Pelolinea
OTU728	Bacteria	Firmicutes	Negativicutes	Selenomonadales	Sporomusaceae	Pelosinus
OTU729	Bacteria	Firmicutes	Clostridia	Clostridiales	Syntrophomonadaceae	Pelospora
OTU730	Bacteria	Firmicutes	Clostridia	Clostridiales	Peptococcaceae	Pelotomaculum
OTU731	Bacteria	Firmicutes	Clostridia	Clostridiales	Peptoniphilus	Peptoniphilus
OTU732	Bacteria	Firmicutes	Clostridia	Clostridiales	Peptostreptococcaceae	Peptostreptococcaceae_incertae_sedis
OTU733	Bacteria	Firmicutes	Clostridia	Eubacteriales	Peptostreptococcaceae	Peptostreptococcus
OTU734	Bacteria	Proteobacteria	Oligoflexia	Bacteriovoracales	Bacteriovoracaceae	Peredibacter
OTU735	Bacteria	Bacteroidota	Cytophagia	Cytophagales	Flammeovirgaceae	Perexilibacter
OTU736	Bacteria	Proteobacteria	Gammaproteobacteria	Pseudomonadales	Moraxellaceae	Perlucidibaca
OTU737	Bacteria	Proteobacteria	Gammaproteobacteria	Arenicellales	Arenicellaceae	Permianibacter
OTU738	Bacteria	Thermotogae	Thermotogae	Petrotogales	Petrotogaceae	Petrotoga
OTU739	Bacteria	Proteobacteria	Alphaproteobacteria	Rhodospirillales	Rhodospirillaceae	Phaeovibrio
OTU740	Bacteria	Firmicutes	Negativicutes	Acidaminococcales	Acidaminococcaceae	Phascolarctobacterium
OTU741	Bacteria	Proteobacteria	Gammaproteobacteria	Enterobacterales	Erwiniaceae	Phaseolibacter
OTU742	Bacteria	Proteobacteria	Alphaproteobacteria	Caulobacterales	Caulobacteraceae	Phenylobacterium
OTU743	Bacteria	Bacteroidetes	Bacteroidetes	Bacteroidia	Bacteroidales	Phocaeicola
OTU744	Bacteria	Proteobacteria	Gammaproteobacteria	Vibrionales	Vibrionaceae	Photobacterium
OTU745	Bacteria	Proteobacteria	Gammaproteobacteria	Enterobacterales	Morganellaceae	Photorhabdus
OTU746	Bacteria	Proteobacteria	Alphaproteobacteria	NA	NA	Phreatobacter
OTU747	Bacteria	Proteobacteria	Alphaproteobacteria	Rhizobiales	Phyllobacteriaceae	Phyllobacterium
OTU748	Bacteria	Actinobacteria	Actinobacteria	Micromonosporales	Micromonosporaceae	Phytomonospora
OTU749	Bacteria	Proteobacteria	Gammaproteobacteria	Burkholderiales	Alcaligenaceae	Pigmentiphaga
OTU750	Bacteria	Firmicutes	Bacilli	Lactobacillales	Enterococcaceae	Pilibacter
OTU751	Bacteria	Firmicutes	Bacilli	Bacillales	Bacillaceae	Piscibacillus
OTU752	Bacteria	Actinobacteria	Actinobacteria	Micrococcales	Dermatophilaceae	Piscicoccus
OTU753	Bacteria	Proteobacteria	Gammaproteobacteria	Thiotrichales	Piscirickettsiaceae	Piscirickettsia
OTU754	Bacteria	Firmicutes	Bacilli	Bacillales	Planococcaceae	Planococcaceae_incertae_sedis
OTU755	Bacteria	Firmicutes	Bacilli	Bacillales	Planococcaceae	Planococcus
OTU756	Bacteria	Firmicutes	Bacilli	Bacillales	Planococcaceae	Planomicrobium
OTU757	Bacteria	Actinobacteria	Actinobacteria	Micromonosporales	Micromonosporaceae	Plantactinospora
OTU758	Bacteria	Proteobacteria	Gammaproteobacteria	NA	Competibacteraceae	Plasticicumulans
OTU759	Bacteria	Proteobacteria	Alphaproteobacteria	Rhodobacterales	Rhodobacteraceae	Pleomorphobacterium
OTU760	Bacteria	Proteobacteria	Deltaproteobacteria	Myxococcales	Nannocystaceae	Plesiocystis
OTU761	Bacteria	Proteobacteria	Gammaproteobacteria	Enterobacterales	NA	Plesiomonas
OTU762	Bacteria	Proteobacteria	Gammaproteobacteria	Enterobacterales	Enterobacteriaceae	Pluralibacter
OTU763	Bacteria	Bacteroidota	Flavobacteriia	Flavobacteriales	Flavobacteriaceae	Polaribacter
OTU764	Bacteria	Firmicutes	Bacilli	Bacillales	Thermoactinomycetaceae	Polycladomyces
OTU765	Bacteria	Firmicutes	Bacilli	Bacillales	Pontibacillus	Pontibacillus
OTU766	Bacteria	Bacteroidetes	Sphingobacteriia	Sphingobacteriales	NA	Poribacteria_genera_incertae_sedis
OTU767	Bacteria	Bacteroidetes	Bacteroidia	Bacteroidales	Porphyromonadaceae	Porphyromonas
OTU768	Bacteria	Proteobacteria	Gammaproteobacteria	Cellvibrionales	Porticoccaceae	Porticoccus
OTU769	Bacteria	Bacteroidetes	Saprospiria	Saprospirales	Haliscomenobacteraceae	Portibacter
OTU770	Bacteria	Proteobacteria	Gammaproteobacteria	Nevskiales	Steroidobacteraceae	Povalibacter
OTU771	Bacteria	Proteobacteria	Gammaproteobacteria	Enterobacterales	Budviciaceae	Pragia
OTU772	Bacteria	Bacteroidetes	Bacteroidia	Bacteroidales	Prevotellaceae	Prevotella
OTU773	Bacteria	Bacteroidota	Flavobacteriia	Flavobacteriales	Flavobacteriaceae	Pricia
OTU774	Bacteria	Actinobacteria	Actinobacteria	Micrococcales	Promicromonosporaceae	Promicromonospora
OTU775	Bacteria	Actinobacteria	Actinobacteria	Propionibacteriales	Propionibacteriaceae	Propionibacterium
OTU776	Bacteria	Actinobacteria	Actinobacteria	Propionibacteriales	Propionibacteriaceae	Propioniciclava
OTU777	Bacteria	Actinobacteria	Actinomycetia	Propionibacteriales	Nocardioidaceae	Propionicimonas
OTU778	Bacteria	Actinobacteria	Actinobacteria	Propionibacteriales	Propionibacteriaceae	Propioniferax
OTU779	Bacteria	Actinobacteria	Actinobacteria	Propionibacteriales	Propionibacteriaceae	Propionimicrobium
OTU780	Bacteria	Firmicutes	Negativicutes	Selenomonadales	Selenomonadaceae	Propionispira
OTU781	Bacteria	Firmicutes	Negativicutes	Selenomonadales	Sporomusaceae	Propionispora
OTU782	Bacteria	Firmicutes	Clostridia	Clostridiales	NA	Proteiniborus
OTU783	Bacteria	Firmicutes	Clostridia	Eubacteriales	Clostridiaceae	Proteiniclasticum
OTU784	Bacteria	Firmicutes	Clostridia	Eubacteriales	Proteinivoraceae	Proteinivorax
OTU785	Bacteria	Proteobacteria	Gammaproteobacteria	Enterobacterales	Morganellaceae	Proteocatella
OTU786	Bacteria	Proteobacteria	Gammaproteobacteria	Enterobacterales	Morganellaceae	Proteus
OTU787	Bacteria	Proteobacteria	Gammaproteobacteria	Enterobacterales	Morganellaceae	Providencia
OTU788	Bacteria	Proteobacteria	Gammaproteobacteria	Alteromonadales	Pseudoalteromonadaceae	Pseudoalteromonas
OTU789	Bacteria	Proteobacteria	Oligoflexia	Oligoflexales	Pseudobacteriovoracaceae	Pseudobacteriovorax
OTU790	Bacteria	Firmicutes	Clostridia	Clostridiales	HungateiClostridiaceae	Pseudobacteroides
OTU791	Bacteria	Firmicutes	Clostridia	Clostridiales	Lachnospiraceae	Pseudobutyrivibrio
OTU792	Bacteria	Proteobacteria	Gammaproteobacteria	Enterobacterales	Enterobacteriaceae	Pseudocitrobacter
OTU793	Bacteria	Actinobacteria	Actinobacteria	Micrococcales	Microbacteriaceae	Pseudoclavibacter
OTU794	Bacteria	Proteobacteria	Gammaproteobacteria	NA	NA	Pseudohongiella
OTU795	Bacteria	Actinobacteria	Actinobacteria	Kineosporiales	Kineosporiaceae	Pseudokineococcus
OTU796	Bacteria	Proteobacteria	Gammaproteobacteria	Cellvibrionales	Cellvibrionaceae	Pseudomaricurvus
OTU797	Bacteria	Proteobacteria	Gammaproteobacteria	Pseudomonadales	Pseudomonadaceae	Pseudomonas
OTU798	Bacteria	Actinobacteria	Actinobacteria	Pseudonocardiales	Pseudonocardiaceae	Pseudonocardia
OTU799	Bacteria	Bacteroidetes	Sphingobacteriia	Sphingobacteriales	Sphingobacteriaceae	Pseudorhodobacter
OTU800	Bacteria	Proteobacteria	Gammaproteobacteria	Oceanospirillales	Oceanospirillaceae	Pseudospirillum
OTU801	Bacteria	Thermotogae	Thermotogae	Thermotogales	Thermotogaceae	Pseudothermotoga
OTU802	Bacteria	Proteobacteria	Alphaproteobacteria	Hyphomicrobiales	Pseudoxanthobacteraceae	Pseudoxanthobacter
OTU803	Bacteria	Proteobacteria	Gammaproteobacteria	Xanthomonadales	Xanthomonadaceae	Pseudoxanthomonas
OTU804	Bacteria	Firmicutes	Bacilli	Bacillales	Bacillaceae	Psychrobacillus
OTU805	Bacteria	Proteobacteria	Gammaproteobacteria	Pseudomonadales	Moraxellaceae	Psychrobacter
OTU806	Bacteria	Proteobacteria	Gammaproteobacteria	Alteromonadales	Psychromonadaceae	Psychromonas
OTU807	Bacteria	Proteobacteria	Gammaproteobacteria	Alteromonadales	Pseudoalteromonadaceae	Psychrosphaera
OTU808	Bacteria	Firmicutes	Bacilli	Bacillales	Sporolactobacillaceae	Pullulanibacillus
OTU809	Bacteria	Verrucomicrobia	Opitutae	Puniceicoccales	Puniceicoccaceae	Puniceicoccus
OTU810	Bacteria	Proteobacteria	Betaproteobacteria	Burkholderiales	Alcaligenaceae	Pusillimonas
OTU811	Bacteria	Actinobacteria	Actinobacteria	Kineosporiales	Kineosporiaceae	Quadrisphaera
OTU812	Bacteria	Proteobacteria	Betaproteobacteria	Rhodocyclales	Azonexaceae	Quatrionicoccus
OTU813	Bacteria	Proteobacteria	Gammaproteobacteria	Enterobacterales	Yersiniaceae	Rahnella
OTU814	Bacteria	Proteobacteria	Betaproteobacteria	Burkholderiales	Burkholderiaceae	Ralstonia
OTU815	Bacteria	Proteobacteria	Gammaproteobacteria	Enterobacterales	Enterobacteriaceae	Raoultella
OTU816	Bacteria	Actinobacteria	Actinobacteria	Micrococcales	Rarobacteraceae	Rarobacter
OTU817	Bacteria	Actinobacteria	Actinobacteria	Micrococcales	Microbacteriaceae	Rathayibacter
OTU818	Bacteria	Bacteroidota	Cytophagia	Cytophagales	Reichenbachiellaceae	Reichenbachiella
OTU819	Bacteria	Proteobacteria	Gammaproteobacteria	Oceanospirillales	Saccharospirillaceae	Reinekea
OTU820	Bacteria	Proteobacteria	Alphaproteobacteria	Rhodospirillales	NA	Reyranella
OTU821	Bacteria	Proteobacteria	Gammaproteobacteria	Chromatiales	Chromatiaceae	Rhabdochromatium
OTU822	Bacteria	Proteobacteria	Gammaproteobacteria	Chromatiales	Chromatiaceae	Rheinheimera
OTU823	Bacteria	Proteobacteria	Betaproteobacteria	Burkholderiales	NA	Rhizobacter
OTU824	Bacteria	Proteobacteria	Alphaproteobacteria	Rhizobiales	Rhizobiaceae	Rhizobium
OTU825	Bacteria	Proteobacteria	Alphaproteobacteria	Micropepsales	Micropepsaceae	Rhizomicrobium
OTU826	Bacteria	Proteobacteria	Alphaproteobacteria	Rhodobacterales	Rhodobacteraceae	Rhodobacter
OTU827	Bacteria	Actinobacteria	Actinobacteria	Corynebacteriales	Nocardiaceae	Rhodococcus
OTU828	Bacteria	Proteobacteria	Betaproteobacteria	Rhodocyclales	Rhodocyclaceae	Rhodocyclus
OTU829	Bacteria	Actinobacteria	Actinobacteria	Micrococcales	Microbacteriaceae	Rhodoglobus
OTU830	Bacteria	Proteobacteria	Alphaproteobacteria	Rhizobiales	Rhodobiaceae	Rhodoligotrophos
OTU831	Bacteria	Actinobacteria	Actinobacteria	Micrococcales	Microbacteriaceae	Rhodoluna
OTU832	Bacteria	Proteobacteria	Alphaproteobacteria	Rhodospirillales	Acetobacteraceae	Rhodopila
OTU833	Bacteria	Proteobacteria	Alphaproteobacteria	Rhodothalassiales	Rhodothalassiaceae	Rhodothalassium
OTU834	Bacteria	Bacteroidetes	NA	Bacteroidetes Order II. Incertae sedis	Rhodothermaceae	Rhodothermus
OTU835	Bacteria	Proteobacteria	Alphaproteobacteria	Rickettsiales	Rickettsiaceae	Rickettsia
OTU836	Bacteria	Firmicutes	Clostridia	Clostridiales	Peptostreptococcaceae	Romboutsia
OTU837	Bacteria	Firmicutes	Clostridia	Clostridiales	Lachnospiraceae	Roseburia
OTU838	Bacteria	Proteobacteria	Alphaproteobacteria	Rhodobacterales	Rhodobacteraceae	Roseicitreum
OTU839	Bacteria	Proteobacteria	Gammaproteobacteria	Enterobacterales	Erwiniaceae	Rosenbergiella
OTU840	Bacteria	Proteobacteria	Alphaproteobacteria	Rhodospirillales	Acetobacteraceae	Roseococcus
OTU841	Bacteria	Proteobacteria	Alphaproteobacteria	Rhodospirillales	Acetobacteraceae	Roseomonas
OTU842	Bacteria	Bacteroidetes	NA	Bacteroidetes Order II. Incertae sedis	Rhodothermaceae	Roseospira
OTU843	Bacteria	Proteobacteria	Alphaproteobacteria	Rhodobacterales	Rhodobacteraceae	Roseovarius
OTU844	Bacteria	Actinobacteria	Actinobacteria	Micrococcales	Micrococcaceae	Rothia
OTU845	Bacteria	Actinobacteria	Actinobacteria	Micrococcales	Ruaniaceae	Ruania
OTU846	Bacteria	Proteobacteria	Alphaproteobacteria	Rhodobacterales	Rhodobacteraceae	Rubellimicrobium
OTU847	Bacteria	Actinobacteria	Rubrobacteria	Rubrobacterales	Rubrobacteraceae	Rubrobacter
OTU848	Bacteria	Proteobacteria	Gammaproteobacteria	Aeromonadales	Succinivibrionaceae	Ruminobacter
OTU849	Bacteria	Firmicutes	Clostridia	Clostridiales	Ruminococcaceae	Ruminococcus
OTU850	Bacteria	Firmicutes	Bacilli	Bacillales	Planococcaceae	Rummeliibacillus
OTU851	Bacteria	Firmicutes	Bacilli	Bacillales	Paenibacillaceae	Saccharibacillus
OTU852	Bacteria	Firmicutes	Bacilli	Bacillales	Paenibacillaceae	Saccharibacteria_genera_incertae_sedis
OTU853	Bacteria	Firmicutes	Clostridia	Clostridiales	HungateiClostridiaceae	Saccharofermentans
OTU854	Bacteria	Actinobacteria	Actinobacteria	Pseudonocardiales	Pseudonocardiaceae	Saccharomonospora
OTU855	Bacteria	Actinobacteria	Actinobacteria	Pseudonocardiales	Pseudonocardiaceae	Saccharopolyspora
OTU856	Bacteria	Proteobacteria	Gammaproteobacteria	Oceanospirillales	Saccharospirillaceae	Saccharospirillum
OTU857	Bacteria	Actinobacteria	Actinobacteria	Pseudonocardiales	Pseudonocardiaceae	Saccharothrix
OTU858	Bacteria	Actinobacteria	Actinobacteria	Micrococcales	Beutenbergiaceae	Salana
OTU859	Bacteria	Proteobacteria	Gammaproteobacteria	Oceanospirillales	Halomonadaceae	Salicola
OTU860	Bacteria	Firmicutes	Bacilli	Bacillales	Bacillaceae	Salimicrobium
OTU861	Bacteria	Firmicutes	Bacilli	Bacillales	Bacillaceae	Salinibacillus
OTU862	Bacteria	Bacteroidetes	NA	Bacteroidetes Order II. Incertae sedis	Rhodothermaceae	Salinibacter
OTU863	Bacteria	Firmicutes	Bacilli	Bacillales	Staphylococcaceae	Salinicoccus
OTU864	Bacteria	Proteobacteria	Gammaproteobacteria	Oceanospirillales	Halomonadaceae	Salinicola
OTU865	Bacteria	Proteobacteria	Gammaproteobacteria	Salinisphaerales	Salinisphaeraceae	Salinisphaera
OTU866	Bacteria	Proteobacteria	Gammaproteobacteria	Oceanospirillales	Saccharospirillaceae	Salinispirillum
OTU867	Bacteria	Actinobacteria	Actinobacteria	Micrococcales	Micromonosporaceae	Salinispora
OTU868	Bacteria	Firmicutes	Bacilli	Bacillales	Thermoactinomycetaceae	Salinithrix
OTU869	Bacteria	Proteobacteria	Gammaproteobacteria	Vibrionales	Vibrionaceae	Salinivibrio
OTU870	Bacteria	Firmicutes	Bacilli	Bacillales	Bacillaceae	Salirhabdus
OTU871	Bacteria	Firmicutes	Bacilli	Bacillales	Bacillaceae	Saliterribacillus
OTU872	Bacteria	Proteobacteria	Gammaproteobacteria	Enterobacterales	Enterobacteriaceae	Salmonella
OTU873	Bacteria	Firmicutes	Bacilli	Bacillales	Bacillaceae	Salsuginibacillus
OTU874	Bacteria	Proteobacteria	Gammaproteobacteria	Enterobacterales	Yersiniaceae	Samsonia
OTU875	Bacteria	Proteobacteria	Alphaproteobacteria	Sphingomonadales	Sphingomonadaceae	Sandaracinobacter
OTU876	Bacteria	Proteobacteria	Myxococcales	Sorangiineae	Sandaracinaceae	Sandaracinus
OTU877	Bacteria	Actinobacteria	Actinobacteria	Micrococcales	Sanguibacteraceae	Sanguibacter
OTU878	Bacteria	NA	NA	NA	NA	Schwartzia
OTU879	Bacteria	Firmicutes	Tissierellia	NA	NA	Sedimentibacter
OTU880	Bacteria	Proteobacteria	Gammaproteobacteria	NA	NA	Sedimenticola
OTU881	Bacteria	Firmicutes	Bacilli	Bacillales	Bacillaceae	Sediminibacillus
OTU882	Bacteria	Actinobacteria	Actinomycetia	Corynebacteriales	Segniliparaceae	Segniliparus
OTU883	Bacteria	Firmicutes	Bacilli	Bacillales	Thermoactinomycetaceae	Seinonella
OTU884	Bacteria	Firmicutes	Negativicutes	Selenomonadales	Selenomonadaceae	Selenomonas
OTU885	Bacteria	Actinobacteria	Actinomycetia	Micrococcales	Beutenbergiaceae	Serinibacter
OTU886	Bacteria	Actinobacteria	Actinobacteria	Micrococcales	Intrasporangiaceae	Serinicoccus
OTU887	Bacteria	Proteobacteria	Gammaproteobacteria	Pseudomonadales	Pseudomonadaceae	Serpens
OTU888	Bacteria	Proteobacteria	Gammaproteobacteria	Enterobacterales	Yersiniaceae	Serratia
OTU889	Bacteria	Proteobacteria	Gammaproteobacteria	Alteromonadales	Shewanellaceae	Shewanella
OTU890	Bacteria	Proteobacteria	Gammaproteobacteria	Enterobacterales	Enterobacteriaceae	Shimwellia
OTU891	Bacteria	Proteobacteria	Gammaproteobacteria	Enterobacterales	Enterobacteriaceae	Siccibacter
OTU892	Bacteria	Proteobacteria	Gammaproteobacteria	Xanthomonadales	Xanthomonadaceae	Silanimonas
OTU893	Bacteria	Proteobacteria	Gammaproteobacteria	Cellvibrionales	Cellvibrionaceae	Simiduia
OTU894	Bacteria	Chlamydiae	Chlamydiia	Parachlamydiales	Simkaniaceae	Simkania
OTU895	Bacteria	Planctomycetes	Planctomycetia	Planctomycetales	Isosphaeraceae	Singulisphaera
OTU896	Bacteria	Firmicutes	Bacilli	Bacillales	Bacillaceae	Sinibacillus
OTU897	Bacteria	Proteobacteria	Gammaproteobacteria	Cellvibrionales	Spongiibacteraceae	Sinobacterium
OTU898	Bacteria	Actinobacteria	Actinobacteria	Micrococcales	Micrococcaceae	Sinomonas
OTU899	Bacteria	Proteobacteria	Alphaproteobacteria	Rhodospirillales	Rhodospirillaceae	Skermanella
OTU900	Bacteria	Actinobacteria	Actinobacteria	Corynebacteriales	Gordoniaceae	Skermania
OTU901	Bacteria	Proteobacteria	Deltaproteobacteria	Syntrophales	Smithellaceae	Smithella
OTU902	Bacteria	Proteobacteria	Gammaproteobacteria	Enterobacterales	Pectobacteriaceae	Sodalis
OTU903	Bacteria	Firmicutes	Bacilli	Bacillales	Planococcaceae	Solibacillus
OTU904	Bacteria	Proteobacteria	Gammaproteobacteria	Nevskiales	Sinobacteraceae	Solimonas
OTU905	Bacteria	Actinobacteria	Thermoleophilia	Solirubrobacterales	Solirubrobacteraceae	Solirubrobacter
OTU906	Bacteria	Verrucomicrobia	NA	NA	NA	Spartobacteria_genera_incertae_sedis
OTU907	Bacteria	Actinobacteria	Actinobacteria	Micrococcales	Brevibacteriaceae	Spelaeicoccus
OTU908	Bacteria	Spirochaetes	Spirochaetia	Spirochaetales	Spirochaetaceae	Sphaerochaeta
OTU909	Bacteria	Bacteroidetes	Sphingobacteriia	Sphingobacteriales	Sphingobacteriaceae	Sphingobacterium
OTU910	Bacteria	Proteobacteria	Alphaproteobacteria	Sphingomonadales	Sphingobacteriaceae	Sphingobium
OTU911	Bacteria	Proteobacteria	Alphaproteobacteria	Sphingomonadales	Sphingobacteriaceae	Sphingomonas
OTU912	Bacteria	Proteobacteria	Alphaproteobacteria	Sphingomonadales	Sphingobacteriaceae	Sphingosinicella
OTU913	Bacteria	Proteobacteria	Gammaproteobacteria	Chromatiales	Ectothiorhodospiraceae	Spiribacter
OTU914	Bacteria	Spirochaetes	Spirochaetia	Spirochaetales	Spirochaetaceae	Spirochaeta
OTU915	Bacteria	Tenericutes	Mollicutes	Entomoplasmatales	Spiroplasmataceae	Spiroplasma
OTU916	Bacteria	Proteobacteria	Gammaproteobacteria	Cellvibrionales	Spongiibacteraceae	Spongiibacter
OTU917	Bacteria	Firmicutes	Clostridia	Clostridiales	Peptostreptococcaceae	Sporacetigenium
OTU918	Bacteria	Firmicutes	Tissierellia	Tissierellales	Tissierellaceae	Sporanaerobacter
OTU919	Bacteria	Actinobacteria	Actinobacteria	Sporichthyales	Sporichthyaceae	Sporichthya
OTU920	Bacteria	Firmicutes	Clostridia	Clostridiales	Ruminococcaceae	Sporobacter
OTU921	Bacteria	Firmicutes	Clostridia	Halanaerobiales	Halobacteroidaceae	Sporohalobacter
OTU922	Bacteria	Firmicutes	Bacilli	Bacillales	Sporolactobacillaceae	Sporolactobacillaceae_incertae_sedis
OTU923	Bacteria	Firmicutes	Bacilli	Bacillales	Sporolactobacillaceae	Sporolactobacillus
OTU924	Bacteria	Firmicutes	Negativicutes	Selenomonadales	Sporomusaceae	Sporolituus
OTU925	Bacteria	Firmicutes	Negativicutes	Selenomonadales	Sporomusaceae	Sporomusa
OTU926	Bacteria	Firmicutes	Clostridia	Clostridiales	Clostridiaceae	Sporosalibacterium
OTU927	Bacteria	Firmicutes	Bacilli	Bacillales	Planococcaceae	Sporosarcina
OTU928	Bacteria	Actinobacteria	Actinomycetia	Glycomycetales	Glycomycetaceae	Stackebrandtia
OTU929	Bacteria	Firmicutes	Bacilli	Bacillales	Staphylococcaceae	Staphylococcus
OTU930	Bacteria	Proteobacteria	Gammaproteobacteria	Xanthomonadales	Xanthomonadaceae	Stenotrophomonas
OTU931	Bacteria	Actinobacteria	Actinobacteria	Streptomycetales	Streptomycetaceae	Streptacidiphilus
OTU932	Bacteria	Firmicutes	Bacilli	Lactobacillales	Streptococcaceae	Streptococcus
OTU933	Bacteria	Actinobacteria	Actinobacteria	Actinomycetales	Streptomycetaceae	Streptomyces
OTU934	Bacteria	Actinobacteria	Actinobacteria	Streptosporangiales	Streptosporangiaceae	Streptosporangium
OTU935	Bacteria	Verrucomicrobia	Verrucomicrobiae	Verrucomicrobiales	Verrucomicrobiaceae	Subdivision3_genera_incertae_sedis
OTU936	Bacteria	Firmicutes	Clostridia	Eubacteriales	Oscillospiraceae	Subdoligranulum
OTU937	Bacteria	Proteobacteria	Gammaproteobacteria	Aeromonadales	Succinivibrionaceae	Succinatimonas
OTU938	Bacteria	Proteobacteria	Gammaproteobacteria	Aeromonadales	Succinivibrionaceae	Succinimonas
OTU939	Bacteria	Proteobacteria	Gammaproteobacteria	Aeromonadales	Succinivibrionaceae	Succinivibrio
OTU940	Bacteria	Proteobacteria	Alphaproteobacteria	Rhodobacterales	Rhodobacteraceae	Sulfitobacter
OTU941	Bacteria	Firmicutes	Clostridia	Clostridiales	Clostridiales incertae sedis	Sulfobacillus
OTU942	Bacteria	Proteobacteria	Betaproteobacteria	Nitrosomonadales	Sulfuricellaceae	Sulfuriferula
OTU943	Bacteria	Proteobacteria	Epsilonproteobacteria	Campylobacterales	Thiovulaceae	Sulfurimonas
OTU944	Bacteria	Proteobacteria	Gammaproteobacteria	Thiotrichales	Piscirickettsiaceae	Sulfurivirga
OTU945	Bacteria	Proteobacteria	Betaproteobacteria	Burkholderiales	Sutterellaceae	Sutterella
OTU946	Bacteria	Firmicutes	Clostridia	Eubacteriales	Symbiobacteriaceae	Symbiobacterium
OTU947	Bacteria	Firmicutes	Clostridia	Thermoanaerobacterales	Thermoanaerobacterales Family III. Incertae Sedis	Syntrophaceticus
OTU948	Bacteria	Proteobacteria	Deltaproteobacteria	Syntrophobacterales	Syntrophobacteraceae	Syntrophobacter
OTU949	Bacteria	Firmicutes	Clostridia	Clostridiales	Syntrophomonadaceae	Syntrophomonas
OTU950	Bacteria	Proteobacteria	Deltaproteobacteria	Syntrophorhabdales	Syntrophorhabdaceae	Syntrophorhabdus
OTU951	Bacteria	Firmicutes	Clostridia	Eubacteriales	Syntrophomonadaceae	Syntrophothermus
OTU952	Bacteria	Proteobacteria	Deltaproteobacteria	Syntrophobacterales	Syntrophaceae	Syntrophus
OTU953	Bacteria	Proteobacteria	Gammaproteobacteria	Xanthomonadales	Rhodanobacteraceae	Tahibacter
OTU954	Bacteria	Proteobacteria	Gammaproteobacteria	Enterobacterales	Erwiniaceae	Tatumella
OTU955	Bacteria	Proteobacteria	Betaproteobacteria	Burkholderiales	Alcaligenaceae	Taylorella
OTU956	Bacteria	Proteobacteria	Betaproteobacteria	Burkholderiales	Oxalobacteraceae	Telluria
OTU957	Bacteria	Proteobacteria	Alphaproteobacteria	Kordiimonadales	Temperatibacteraceae	Temperatibacter
OTU958	Bacteria	Firmicutes	Bacilli	Bacillales	Bacillaceae	Tenuibacillus
OTU959	Bacteria	Firmicutes	Bacilli	Bacillales	Bacillaceae	Tepidamorphus
OTU960	Bacteria	Firmicutes	Bacilli	Bacillales	Bacillaceae	Tepidibacillus
OTU961	Bacteria	Firmicutes	Clostridia	Eubacteriales	Peptostreptococcaceae	Tepidibacter
OTU962	Bacteria	Firmicutes	Tissierellia	Tissierellales	Tissierellaceae	Tepidimicrobium
OTU963	Bacteria	Proteobacteria	Betaproteobacteria	Burkholderiales	NA	Tepidimonas
OTU964	Bacteria	Planctomycetes	Phycisphaerae	Tepidisphaerales	Tepidisphaeraceae	Tepidisphaera
OTU965	Bacteria	Proteobacteria	Alphaproteobacteria	Rhizobiales	Methylocystaceae	Terasakiella
OTU966	Bacteria	Actinobacteria	Actinobacteria	Micrococcales	Intrasporangiaceae	Teredinibacter
OTU967	Bacteria	Firmicutes	Bacilli	Bacillales	Bacillaceae	Terribacillus
OTU968	Bacteria	Firmicutes	Clostridia	Clostridiales	Peptostreptococcaceae	Terrisporobacter
OTU969	Bacteria	Actinobacteria	Actinobacteria	Propionibacteriales	Propionibacteriaceae	Tessaracoccus
OTU970	Bacteria	Firmicutes	Bacilli	Lactobacillales	Enterococcaceae	Tetragenococcus
OTU971	Bacteria	Actinobacteria	Actinobacteria	Micrococcales	Intrasporangiaceae	Tetrasphaera
OTU972	Bacteria	Firmicutes	Bacilli	Bacillales	Bacillaceae	Texcoconibacillus
OTU973	Bacteria	Firmicutes	Bacilli	Bacillales	Bacillaceae	Thalassobacillus
OTU974	Bacteria	Proteobacteria	Alphaproteobacteria	Rhodospirillales	Rhodospirillaceae	Thalassobaculum
OTU975	Bacteria	Proteobacteria	Gammaproteobacteria	Oceanospirillales	Oceanospirillaceae	Thalassolituus
OTU976	Bacteria	Firmicutes	Clostridia	Clostridiales	Clostridiales Family XVII. Incertae Sedis	Thermaerobacter
OTU977	Bacteria	Synergistetes	Synergistia	Synergistales	Synergistaceae	Thermanaerovibrio
OTU978	Bacteria	Firmicutes	Bacilli	Bacillales	Bacillales Family X. Incertae Sedis	Thermicanus
OTU979	Bacteria	Proteobacteria	Acidithiobacillia	Acidithiobacillales	Thermithiobacillaceae	Thermithiobacillus
OTU980	Bacteria	Firmicutes	Bacilli	Bacillales	Thermoactinomycetaceae	Thermoactinomyces
OTU981	Bacteria	Firmicutes	Clostridia	Thermoanaerobacterales	Thermoanaerobacteraceae	Thermoanaerobacter
OTU982	Bacteria	Firmicutes	Bacilli	Bacillales	Paenibacillaceae	Thermobacillus
OTU983	Bacteria	Actinobacteria	Actinomycetia	Streptosporangiales	Nocardiopsaceae	Thermobifida
OTU984	Bacteria	Proteobacteria	Gammaproteobacteria	Chromatiales	Chromatiaceae	Thermochromatium
OTU985	Bacteria	Firmicutes	Clostridia	Thermoanaerobacterales	Thermodesulfobiaceae	Thermodesulfobium
OTU986	Bacteria	Nitrospirae	Nitrospira	Nitrospirales	Nitrospiraceae	Thermodesulfovibrio
OTU987	Bacteria	Firmicutes	Clostridia	Clostridiales	Clostridiaceae	Thermohalobacter
OTU988	Bacteria	Firmicutes	Thermolithobacteria	Thermolithobacterales	Thermolithobacteraceae	Thermolithobacter
OTU989	Bacteria	Firmicutes	Bacilli	Bacillales	Bacillaceae	Thermolongibacillus
OTU990	Bacteria	Chloroflexi	Anaerolineae	Anaerolineales	Anaerolineaceae	Thermomarinilinea
OTU991	Bacteria	Chloroflexi	Thermomicrobia	Thermomicrobiales	Thermomicrobiaceae	Thermomicrobium
OTU992	Bacteria	Proteobacteria	Gammaproteobacteria	Xanthomonadales	Xanthomonadaceae	Thermomonas
OTU993	Bacteria	Actinobacteria	Actinobacteria	Streptosporangiales	Thermomonosporaceae	Thermomonospora
OTU994	Bacteria	Actinobacteria	Actinobacteria	Streptosporangiales	Streptosporangiaceae	Thermopolyspora
OTU995	Bacteria	Chloroflexi	Thermomicrobia	NA	NA	Thermorudis
OTU996	Bacteria	Firmicutes	Clostridia	Thermosediminibacterales	Thermosediminibacteraceae	Thermosediminibacter
OTU997	Bacteria	Firmicutes	Clostridia	Eubacteriales	Syntrophomonadaceae	Thermosyntropha
OTU998	Bacteria	Deinococcus-Thermus	Deinococci	Thermales	Thermaceae	Thermus
OTU999	Bacteria	Proteobacteria	Gammaproteobacteria	Thiotrichales	Piscirickettsiaceae	Thioalkalimicrobium
OTU1000	Bacteria	Proteobacteria	Gammaproteobacteria	Chromatiales	Thioalkalispiraceae	Thioalkalispira
OTU1001	Bacteria	Proteobacteria	Gammaproteobacteria	Chromatiales	Ectothiorhodospiraceae	Thioalkalivibrio
OTU1002	Bacteria	Proteobacteria	Betaproteobacteria	Nitrosomonadales	Thiobacillaceae	Thiobacillus
OTU1003	Bacteria	Proteobacteria	Gammaproteobacteria	Chromatiales	Chromatiaceae	Thiocapsa
OTU1004	Bacteria	Proteobacteria	Gammaproteobacteria	Chromatiales	Chromatiaceae	Thiococcus
OTU1005	Bacteria	Proteobacteria	Gammaproteobacteria	Chromatiales	Chromatiaceae	Thiocystis
OTU1006	Bacteria	Proteobacteria	Gammaproteobacteria	Chromatiales	Chromatiaceae	Thiodictyon
OTU1007	Bacteria	Proteobacteria	Gammaproteobacteria	Chromatiales	Halothiobacillaceae	Thiofaba
OTU1008	Bacteria	Proteobacteria	Gammaproteobacteria	Chromatiales	Chromatiaceae	Thioflavicoccus
OTU1009	Bacteria	Proteobacteria	Gammaproteobacteria	Chromatiales	Ectothiorhodospiraceae	Thiogranum
OTU1010	Bacteria	Proteobacteria	Gammaproteobacteria	Chromatiales	NA	Thiohalobacter
OTU1011	Bacteria	Proteobacteria	Gammaproteobacteria	Chromatiales	Chromatiaceae	Thiohalocapsa
OTU1012	Bacteria	Proteobacteria	Gammaproteobacteria	Chromatiales	Thioalkalispiraceae	Thiohalophilus
OTU1013	Bacteria	Proteobacteria	Gammaproteobacteria	NA	NA	Thiohalorhabdus
OTU1014	Bacteria	Proteobacteria	Gammaproteobacteria	Chromatiales	Chromatiaceae	Thiolamprovum
OTU1015	Bacteria	Proteobacteria	Gammaproteobacteria	Thiotrichales	Piscirickettsiaceae	Thiomicrospira
OTU1016	Bacteria	Proteobacteria	Betaproteobacteria	Burkholderiales	NA	Thiomonas
OTU1017	Bacteria	Proteobacteria	Gammaproteobacteria	Chromatiales	Chromatiaceae	Thiophaeococcus
OTU1018	Bacteria	Proteobacteria	Gammaproteobacteria	Chromatiales	Thioprofundaceae	Thioprofundum
OTU1019	Bacteria	Proteobacteria	Gammaproteobacteria	Pseudomonadales	Pseudomonadaceae	Thiopseudomonas
OTU1020	Bacteria	Proteobacteria	Epsilonproteobacteria	NA	NA	Thioreductor
OTU1021	Bacteria	Proteobacteria	Gammaproteobacteria	Chromatiales	Chromatiaceae	Thiorhodococcus
OTU1022	Bacteria	Proteobacteria	Gammaproteobacteria	Chromatiales	Ectothiorhodospiraceae	Thiorhodospira
OTU1023	Bacteria	Proteobacteria	Gammaproteobacteria	Thiotrichales	Thiotrichaceae	Thiothrix
OTU1024	Bacteria	Proteobacteria	Gammaproteobacteria	Chromatiales	Halothiobacillaceae	Thiovirga
OTU1025	Bacteria	Proteobacteria	Gammaproteobacteria	Enterobacterales	Thorselliaceae	Thorsellia
OTU1026	Bacteria	Firmicutes	Tissierellia	Tissierellales	Tissierellaceae	Tissierella
OTU1027	Bacteria	Proteobacteria	Alphaproteobacteria	Rhodosprilliales	Rhodospirillaceae	Tistrella
OTU1028	Bacteria	Proteobacteria	Gammaproteobacteria	Aeromonadales	Aeromonadaceae	Tolumonas
OTU1029	Bacteria	Actinobacteria	Actinomycetia	Corynebacteriales	NA	Tomitella
OTU1030	Bacteria	Proteobacteria	Gammaproteobacteria	Enterobacterales	Enterobacteriaceae	Trabulsiella
OTU1031	Bacteria	Spirochaetes	Spirochaetia	Spirochaetales	Spirochaetaceae	Treponema
OTU1032	Bacteria	Firmicutes	Bacilli	Lactobacillales	Carnobacteriaceae	Trichococcus
OTU1033	Bacteria	Actinobacteria	Actinobacteria	Micrococcales	NA	Tropheryma
OTU1034	Bacteria	Actinobacteria	Actinobacteria	Actinomycetales	Actinomycetaceae	Trueperella
OTU1035	Bacteria	Actinobacteria	Actinobacteria	Corynebacteriales	Tsukamurellaceae	Tsukamurella
OTU1036	Bacteria	Firmicutes	Bacilli	Bacillales	Sporolactobacillaceae	Tuberibacillus
OTU1037	Bacteria	Firmicutes	Bacilli	Bacillales	Alicyclobacillaceae	Tumebacillus
OTU1038	Bacteria	Actinobacteria	Actinobacteria	Corynebacteriales	Corynebacteriaceae	Turicella
OTU1039	Bacteria	Firmicutes	Erysipelotrichia	Erysipelotrichales	Erysipelotrichaceae	Turicibacter
OTU1040	Bacteria	Proteobacteria	Gammaproteobacteria	Cellvibrionales	Cellvibrionaceae	Umboniibacter
OTU1041	Bacteria	Firmicutes	Bacilli	Bacillales	Planococcaceae	Ureibacillus
OTU1042	Bacteria	Proteobacteria	Betaproteobacteria	Neisseriales	Neisseriaceae	Uruburuella
OTU1043	Bacteria	Firmicutes	Bacilli	Lactobacillales	Vagococcus	Vagococcus
OTU1044	Bacteria	Candidatus_Melainabacteria	NA	Vampirovibrionales	NA	Vampirovibrio
OTU1045	Bacteria	Actinobacteria	Actinobacteria	Actinomycetales	Actinomycetaceae	Varibaculum
OTU1046	Bacteria	Firmicutes	Negativicutes	Vellionellales	Veillonellaceae	Veillonella
OTU1047	Bacteria	Actinobacteria	Actinobacteria	Micromonosporales	Micromonosporaceae	Verrucosispora
OTU1048	Bacteria	Proteobacteria	Gammaproteobacteria	Vibrionales	Vibrionaceae	Vibrio
OTU1049	Bacteria	Firmicutes	Bacilli	Bacillales	Bacillaceae	Virgibacillus
OTU1050	Bacteria	Firmicutes	Bacilli	Bacillales	Planococcaceae	Viridibacillus
OTU1051	Bacteria	Proteobacteria	Betaproteobacteria	Neisseriales	Neisseriaceae	Vitreoscilla
OTU1052	Bacteria	Proteobacteria	Betaproteobacteria	Neisseriales	Chromobacteriaceae	Vogesella
OTU1053	Bacteria	Proteobacteria	Gammaproteobacteria	Pasteurellales	Pasteurellaceae	Volucribacter
OTU1054	Bacteria	Firmicutes	Bacilli	Bacillales	Bacillaceae	Vulcanibacillus
OTU1055	Bacteria	Proteobacteria	Myxococcales	Cystobacterineae	Vulgatibacteraceae	Vulgatibacter
OTU1056	Bacteria	Firmicutes	Bacilli	Lactobacillales	Leuconostocaceae	Weissella
OTU1057	Bacteria	Proteobacteria	Gammaproteobacteria	NA	NA	Wohlfahrtiimonas
OTU1058	Bacteria	Proteobacteria	Alphaproteobacteria	Hyphomicrobiales	Xanthomonadaceae	Xanthobacter
OTU1059	Bacteria	Proteobacteria	Gammaproteobacteria	Xanthomonadales	Xanthomonadaceae	Xanthomonas
OTU1060	Bacteria	Proteobacteria	Gammaproteobacteria	Enterobacterales	Morganellaceae	Xenorhabdus
OTU1061	Bacteria	Actinobacteria	Actinobacteria	Micrococcales	Promicromonosporaceae	Xylanimonas
OTU1062	Bacteria	Proteobacteria	Gammaproteobacteria	Xanthomonadales	Xanthomonadaceae	Xylella
OTU1063	Bacteria	Proteobacteria	Gammaproteobacteria	Enterobacterales	Yersiniaceae	Yersinia
OTU1064	Bacteria	Actinobacteria	Actinobacteria	Micrococcales	Microbacteriaceae	Yonghaparkia
OTU1065	Bacteria	Firmicutes	Clostridia	Clostridiales	Clostridiaceae	Youngiibacter
OTU1066	Bacteria	Proteobacteria	Alphaproteobacteria	Rhodobacterales	Rhodobacteraceae	Youngimonas
OTU1067	Bacteria	Actinobacteria	Actinobacteria	Micrococcales	Micrococcaceae	Zhihengliuella
OTU1068	Bacteria	Proteobacteria	Gammaproteobacteria	Cellvibrionales	Spongiibacteraceae	Zhongshania
OTU1069	Bacteria	Actinobacteria	Actinobacteria	Micrococcales	Microbacteriaceae	Zimmermannella
OTU1070	Bacteria	Proteobacteria	Gammaproteobacteria	Aeromonadales	Aeromonadaceae	Zobellella
OTU1071	Bacteria	Proteobacteria	Gammaproteobacteria	Oceanospirillales	Halomonadaceae	Zymobacter
