# Supplementary material for: Skin microbiota variation in Indian families
Source: PeerJ journal article supplement (doi:10.7717/peerj.18881), 2025-02-28
Supplement: data.zip [file Supplemental Information3.xlsx]

## Sheet: Sheet1
Sample	G	Generation	Family	Sex	Age	Location	Diet
A1	G1	Grandmother	A	Female	Elderly	Ahmednagar	Veg
A2	G2	Father	A	Male	Middle_age	Ahmednagar	Veg
A3	G2	Mother	A	Female	Middle_age	Ahmednagar	Veg
A4	G3	Daughter	A	Female	Adult	Ahmednagar	Veg
A5	G3	Son	A	Male	Adult	Ahmednagar	Veg
B1	G1	Grandmother	B	Female	Elderly	Ahmednagar	Veg
B2	G2	Father	B	Male	Middle_age	Ahmednagar	Veg
B3	G3	Son	B	Male	Adult	Ahmednagar	Veg
C1	G1	Grandmother	C	Female	Elderly	Pune	Veg
C2	G1	Grandfather	C	Male	Elderly	Pune	Veg
C3	G2	Father	C	Male	Middle_age	Pune	Veg
C4	G2	Mother	C	Female	Middle_age	Pune	Veg
C5	G3	Son	C	Male	Adult	Pune	Veg
D1	G1	Grandmother	D	Female	Elderly	Ahmednagar	Veg
D2	G2	Mother	D	Female	Middle_age	Ahmednagar	Veg
D3	G3	Daughter	D	Female	Adult	Ahmednagar	Veg
E1	G1	Grandfather	E	Male	Elderly	Ahmednagar	Mixed
E2	G2	Father	E	Male	Elderly	Ahmednagar	Mixed
E3	G2	Mother	E	Female	Middle_age	Ahmednagar	Mixed
E4	G3	Daughter	E	Female	Adult	Ahmednagar	Mixed
F1	G1	Grandmother	F	Female	Elderly	Pune	Veg
F2	G2	Father	F	Male	Middle_age	Pune	Mixed
F3	G2	Mother	F	Female	Middle_age	Pune	Mixed
F4	G3	Son	F	Male	Adult	Pune	Mixed
F5	G3	Daughter	F	Female	Adult	Pune	Mixed
G1	G1	Grandmother	G	Female	Elderly	Pune	Veg
G2	G1	Grandfather	G	Male	Elderly	Pune	Veg
G3	G2	Mother	G	Female	Middle_age	Pune	Veg
G4	G3	Son	G	Male	Adult	Pune	Veg
G5	G2	Father	G	Male	Middle_age	Pune	Veg
H1	G1	Grandmother	H	Female	Elderly	Pune	Veg
H2	G1	Grandfather	H	Male	Elderly	Pune	Veg
H3	G2	Father	H	Male	Middle_age	Pune	Veg
H4	G2	Mother	H	Female	Middle_age	Pune	Veg
H5	G3	Daughter	H	Female	Adult	Pune	Veg
I1	G1	Grandmother	I	Female	Elderly	Pune	Mixed
I2	G1	Grandfather	I	Male	Elderly	Pune	Mixed
I3	G2	Father	I	Male	Middle_age	Pune	Mixed
I4	G2	Mother	I	Female	Middle_age	Pune	Mixed
I5	G3	Son	I	Male	Adult	Pune	Mixed
I6	G3	Daughter	I	Female	Adult	Pune	Mixed
J1	G1	Grandmother	J	Female	Elderly	Pune	Mixed
J2	G1	Grandfather	J	Male	Elderly	Pune	Mixed
J3	G2	Father	J	Male	Middle_age	Pune	Mixed
J4	G2	Mother	J	Female	Middle_age	Pune	Mixed
J5	G3	Daughter	J	Female	Adult	Pune	Mixed
K1	G1	Grandmother	K	Female	Elderly	Ahmednagar	Veg
K2	G2	Father	K	Male	Elderly	Ahmednagar	Veg
K3	G2	Mother	K	Female	Middle_age	Ahmednagar	Veg
K4	G3	Son	K	Male	Adult	Ahmednagar	Veg
K5	G3	Son	K	Male	Adult	Ahmednagar	Veg
L1	G1	Grandmother	L	Female	Elderly	Pune	Veg
L2	G2	Father	L	Male	Middle_age	Pune	Veg
L3	G2	Mother	L	Female	Middle_age	Pune	Veg
L4	G3	Son	L	Male	Adult	Pune	Veg
M1	G1	Grandmother	M	Female	Elderly	Pune	Veg
M2	G2	Father	M	Male	Middle_age	Pune	Veg
M3	G2	Mother	M	Female	Middle_age	Pune	Veg
M4	G3	Daughter	M	Female	Adult	Pune	Veg
M5	G3	Son	M	Male	Adult	Pune	Veg
N1	G1	Grandmother	N	Female	Elderly	Pune	Veg
N2	G2	Father	N	Male	Middle_age	Pune	Mixed
N3	G2	Mother	N	Female	Middle_age	Pune	Veg
N4	G3	Daughter	N	Female	Adult	Pune	Veg
N5	G3	Daughter	N	Female	Adult	Pune	Mixed
O1	G1	Grandmother	O	Female	Elderly	Pune	Veg
O2	G1	Grandfather	O	Male	Elderly	Pune	Veg
O3	G1	Grandmother	O	Female	Elderly	Pune	Veg
O4	G1	Grandfather	O	Male	Elderly	Pune	Veg
O5	G2	Father	O	Male	Middle_age	Pune	Veg
O6	G2	Mother	O	Female	Middle_age	Pune	Veg
O7	G3	Son	O	Male	Adult	Pune	Veg
